1 **Title Page**

2 **An atypical F-actin capping protein modulates cytoskeleton behaviors crucial to colonization of**  
3 ***Trichomonas vaginalis***

4 Kai-Hsuan Wang<sup>1,#</sup>, Jing-Yang Chang<sup>1,#</sup>, Fu-An Li<sup>2</sup>, Yen-Ju Chen<sup>1</sup>, Kuan-Yi Wu<sup>1</sup>, Tse-Ling Chu<sup>3</sup>,  
5 Jessica Lin<sup>3</sup>, and Hong-Ming Hsu<sup>1,\*</sup>

6 <sup>1</sup>Department of Tropical Medicine and Parasitology, College of Medicine, National Taiwan University,  
7 Taipei, Taiwan 100233.

8 <sup>2</sup>The Proteomic Core, Institute of Biomedical Sciences, Academia Sinica, Taipei, Taiwan 11529.

9 <sup>3</sup>Taipei First Girls High School, Taipei, Taiwan 100006.

10 <sup>#</sup>These authors contributed equally to this work.

11 <sup>\*</sup>Address correspondence to:

12 Hong-Ming Hsu, Department of Tropical Medicine and Parasitology, College of Medicine, National  
13 Taiwan University, Taipei, Taiwan 100. Tel: 886-2-23123456 ext. 88260; Fax: 886-2-23915294; E-  
14 Mail: [hsuhm@ntu.edu.tw](mailto:hsuhm@ntu.edu.tw)

15

16 **Running title:** CP regulates *T. vaginalis* colonization

17

## 18 Abstract

19 Cytoadherence and consequential migration are crucial for pathogens to establish colonization in  
20 the host. In contrast to the nonadherent isolate of *Trichomonas vaginalis*, the adherent one expresses  
21 more actin-related machinery proteins with more active flagellate-amoeboid morphogenesis, amoeba  
22 migration, and cytoadherence, activities that were abrogated by an actin assembly blocker. By  
23 immunoprecipitation coupled with label-free quantitative proteomics, an F-actin capping protein  
24 (*TvFACP $\alpha$* ) was identified from the actin-centric interactome, with an atypically greater binding  
25 preference to G-actin than F-actin. *TvFACP $\alpha$*  partially colocalized with F-actin at the parasite  
26 pseudopodia protrusion and formed the protein complexes with  $\alpha$ -actinin through its c-terminal domain.  
27 Meanwhile, *TvFACP $\alpha$*  overexpression suppresses F-actin polymerization, amoeboid morphogenesis,  
28 and cytoadherence in this parasite. Ser<sup>2</sup> phosphorylation of *TvFACP $\alpha$*  enriched in the amoeboid stage  
29 of adhered trophozoites was reduced by a CKII inhibitor. The site-directed mutagenesis and CKII  
30 inhibitor treatment revealed that Ser<sup>2</sup> phosphorylation acts as a switching signal to alter *TvFACP $\alpha$*   
31 actin-binding activity and consequent actin cytoskeleton behaviors. Through CKII signaling, *TvFACP $\alpha$*   
32 also controls the conversion of adherent trophozoite from amoeboid migration to flagellate form with  
33 axonemal motility. Together, CKII-dependent Ser<sup>2</sup> phosphorylation regulates *TvFACP $\alpha$*  binding actin  
34 to fine-tune cytoskeleton dynamics and drive crucial behaviors underlying host colonization of *T.*  
35 *vaginalis*.

36  
37 **Keywords:** Actin capping protein/ Actin Cytoskeleton/ Cytoadherence/ Colonization/ *Trichomonas*  
38 *vaginalis*

## 39 Introduction

40  
41 *Trichomonas vaginalis* is a pathogenic protist causing trichomoniasis which is one of the most  
42 prevalent non-viral sexually transmitted diseases, with approximately 180 million new infections  
43 worldwide annually (1).

44 A successful pathogenic infection includes cytoadherence to establish colonization, followed by  
45 migration for population spread. Numerous studies on *Trichomonas vaginalis* have focused on the  
46 cytoadherence mechanism in adhesion molecules, like cadherin (2), rhomboid protease (3), legumain  
47 protease (4), BAP proteins (5), *TvAD1* protein (6), and surface-expressed hydrogenosomal proteins (7,  
48 8, 9, 10). However, the effects of these reputed adhesins in cytoadherence are limited when analyzed  
49 by the gain- or loss-of-function assays (2-10). Thus, we postulated that the cytoadherence of *T.*  
50 *vaginalis* might be regulated by pathways other than adhesion molecules. In mammalian adhesion cells,  
51 transmembrane integrins link peripheral focal protein complexes underneath the cell membrane for  
52 focal adhesion, which is the site that connects the extracellular matrix to transmit traction forces  
53 required for cell migration and activates downstream signaling followed by local cytoskeleton  
54 reorganization (11, 12, 13). A few studies have used ligand competition or antibody neutralization to  
55 demonstrate the involvement of integrin-like molecules in the cytoadherence of *T. vaginalis* (14, 15,  
56 16). Recently, the adherence of clinical *T. vaginalis* isolates to the plastic surface or host cells was

57 shown to be influenced by an actin polymerization blocker (17), implying that the actin cytoskeleton  
58 might coordinate cytoadherence in *T. vaginalis*, but the regulatory mechanism was unknown.

59 Furthermore, flagellate-amoeboid transition immediately after contact with a solid surface or  
60 human vagina epithelium cells (*h*VECs), is another striking feature in adherent isolates of *T. vaginalis*  
61 (18). Upon morphological transformation, the free-swimming flagellar trophozoite converts to an  
62 adherent trophozoite that crawls over a solid surface by pseudopodia-like protrusions referred to as  
63 amoeboid migration. A similar flagellate-amoeboid transition was observed in the pathogenic amoeba,  
64 *Naegleria fowleri*. This free-living trophozoite builds lamellipodia-like protrusions for phagocytosis  
65 and migration driven by actin cytoskeleton machines (19), in which actin expression correlates with its  
66 virulence (20).

67 The actin cytoskeleton is a complex network of actin filaments and actin-associated proteins that  
68 shape cell morphology, drive cellular locomotion, and confer cell adhesion (21, 22, 23). The globular  
69 actin monomer (G-actin) polymerizes into filamentous actin polymers (F-actin), which  
70 are further organized into bundles or branched into three-dimensional networks  
71 for complicated cytoskeleton activities. In the polarized F-actin filament, growth initiates from the  
72 assembly of the Arp2/3 nucleation complex (24), then G-actin is continuously added at the fast-  
73 growing barbed end or dissociated from the pointed end (25). The cellular actin cytoskeleton dynamics  
74 are tightly modulated by a variety of accessory effectors for actin polymerization, depolymerization,  
75 branching, and reorganization (26). In high eukaryotes, F-actin capping protein (CP) is heterodimerized  
76 from  $\alpha$  (CP $\alpha$ ) and  $\beta$  (CP $\beta$ ) subunits to form a mushroom-shaped structure capping the fast-growing  
77 barbed end of F-actin to block off G-actin access and subsequent polymerization. The C-terminal  
78 regions of CP $\alpha$  and CP $\beta$  form as two tentacles to bind actin (27, 28, 29). A set of regulatory proteins  
79 binds to the barbed end of F-actin to prevent the binding of CP, or several proteins directly bind CP to  
80 spatially guide subcellular localization or allosterically alter actin capping activity for instant regulation  
81 of cytoskeleton remodeling (30, 31).

82 Post-translational modifications like phosphorylation and acetylation on the interacting  
83 interface within the c-terminal tentacle of CP $\beta$  alter the actin-binding dynamics (32). Human CP $\alpha$   
84 forms a protein complex with Casein kinase II-interacting protein (CKIP-1) and Casein kinase II (CKII).  
85 CKII phosphorylates the Ser<sup>9</sup> of CP $\alpha$  coordinating CKIP-1 to inhibit capping activity, but this  
86 inhibitory effect seems to be independent of Ser<sup>9</sup> phosphorylation (33, 34). The capacity of CP binding  
87 actin filaments is tightly regulated in a spatial or allosteric manner to fine-tune the actin assembly  
88 dynamics in cells.

89 The mechanisms of actin cytoskeleton regulation in *T. vaginalis* have not been fully elucidated.  
90 *Tv*Fimbrin1 protein (*Tv*Fim1) has been identified *in vitro* to accelerate actin assembly and *in vivo* to  
91 co-localize with F-actin at the cell membrane periphery in the pseudopod-like structures of *T. vaginalis*  
92 upon phagocytosis or migration (35). In this study, a putative F-actin capping protein subunit  $\alpha$   
93 (*Tv*FACP $\alpha$ ) was identified and characterized from the  $\alpha$ -associated protein complexes in *T. vaginalis*.

94

## 95 **Results**

96 **Differential morphogenesis, cytoadherence, and motility of *T. vaginalis***

97 The differential host-parasite interaction between nonadherent T1 and adherent TH17 isolates  
 98 was evaluated by the cytoadherence, morphogenesis, and motility. CFSE-labeled trophozoites were co-  
 99 cultured with the *h*VECs monolayer at MOI of 2:1. Post 60-min infection, ~80% of TH17 but little T1  
 100 trophozoites bound to the *h*VECs monolayer (Figure 1A). Most T1 trophozoites maintained an oval-  
 101 shaped flagellate form, but ~60% of TH17 trophozoites transformed into a flat disk or irregular  
 102 amoeboid form and tightly adhered to the slide surface (Figure 1B). To further observe the dynamics of  
 103 host-parasite interaction, the trophozoites co-cultured with *h*VECs were monitored by time-lapse  
 104 imaging (Figure 1C and Videos 1 and 2), showing that nonadherent T1 trophozoites maintained a  
 105 flagellate form and swam by flagellar locomotion only randomly coming into contact with the *h*VECs.  
 106 By contrast, adherent TH17 trophozoites rapidly transformed into an amoeboid form within 10 min of  
 107 contact with the glass slide and crawled toward *h*VECs via pseudopod-like protrusions, referred to as  
 108 amoeboid migration. In contrast to *T. vaginalis* nonadherent isolate, the adherent isolate displayed more  
 109 active cytoadherence and amoeboid morphogenesis and migration.

Fig.1

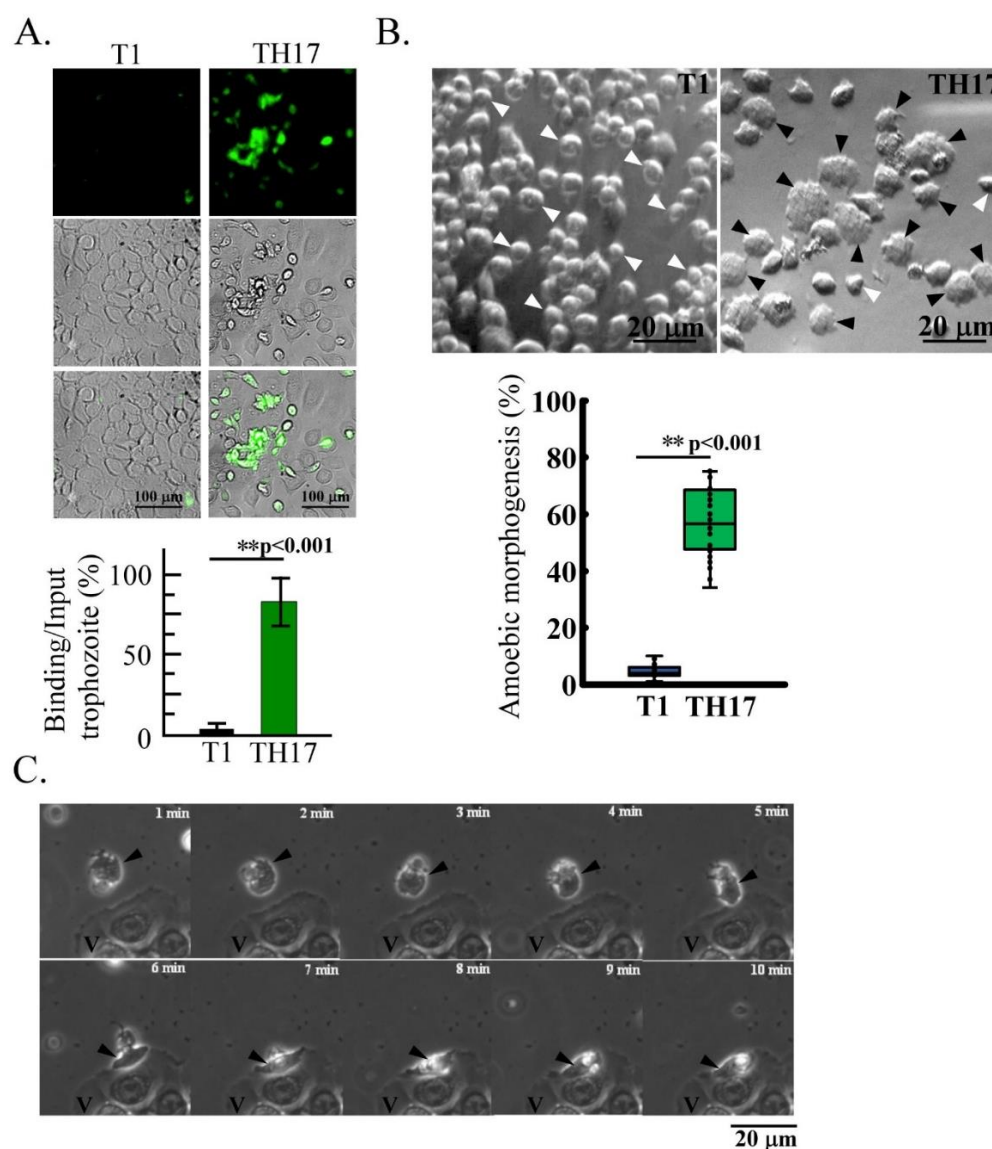

111 **Figure 1. Differential cytoadherence, morphogenesis, migration mode of *T. vaginalis*.** A  
112 variety of behaviors were observed in the nonadherent (T1) and adherent (TH17) isolates. (A.)  
113 The CFSE-preloaded trophozoites were cultured with *h*VECs, then fixed 1 hr post-infection.  
114 The cytoadherence capacity was evaluated by the ratio of binding versus input trophozoites  
115 as shown in the histogram. Scale bar: 100  $\mu$ m. (B.) The ratio of T1 or TH17 trophozoites at  
116 the amoeboid form was measured in  $\sim$ 600 trophozoites from 12 random microscopic fields  
117 as shown in the box and whisker plot. The black and white arrowheads respectively indicate  
118 the representative amoeboid and flagellate trophozoites. Scale bar: 20  $\mu$ m. (C.) TH17  
119 trophozoite (black arrowhead) was co-cultured with *h*VECs (V). The dynamics of amoeboid  
120 migration and morphogenesis were recorded by time-lapse imaging at one frame per 15 sec  
121 over 10 min. Scale bar: 20  $\mu$ m. All experiments were repeated three times. Data in histogram  
122 are presented as mean  $\pm$  SEM. Statistical significance with p-value for each group of data  
123 was analyzed by Student's t-test as indicated (n=3,  $P < 0.01^{**}$ ,  $P < 0.05^*$ , and ns, no  
124 significance).

125

126 **(Please see the attached Video 1)**

127 **Video1 Dynamics of amoeboid morphogenesis and migration in the adherent isolate of *T.***  
128 ***vaginalis*.** The trophozoites from TH17 adherent isolate were co-cultured with *h*VECs. The dynamics  
129 of trophozoite activities were recorded by time-lapse imaging at the capturing rate of one frame per 30  
130 sec over time as defined.

131

132 **(Please see the attached Video 2)**

133 **Video2 Dynamics of migration in the nonadherent isolate of *T. vaginalis*.** The trophozoites from  
134 nonadherent T1 isolate were co-cultured with *h*VECs. The dynamics of trophozoite activities were  
135 recorded by time-lapse imaging at the capturing rate of one frame per 30 sec over time as defined.

136

137

138 **Differential expression of actin-related proteins in *T. vaginalis***

139 Cytoadherence and migration in *T. vaginalis* correlate with actin cytoskeleton (17, 35), therefore,  
140 the expression of  $\alpha$ -actin and  $\alpha$ -actinin, the respective major component and actin bundle linker protein  
141 in the cytoskeleton were investigated. The expression of  $\alpha$ -actin and  $\alpha$ -actinin varied between isolates  
142 and was higher in adherent TH17 and T016 isolates compared to nonadherent T1, special in a fresh  
143 adherent isolate from a clinical vaginitis patient (Figure 2A). The overexpression of HA-*Tv*actin in a  
144 nonadherent isolate did not induce amoeboid morphogenesis or cytoadherence (Figure 2-Figure  
145 Supplement 1), suggesting that  $\alpha$ -actin might be determinant but insufficient to confer cytoadherence  
146 in a nonadherent isolate. Additionally, no detectable  $\alpha$ -actin on the adherent parasite surface indicates  
147 that  $\alpha$ -actin is unlikely to act as an adhesion molecule (Figure 2-Figure Supplement 2).

148 The immunostaining of  $\alpha$ -actin was more intense in TH17 than T1 trophozoites and detected in  
149 tiny punctate or short bundles in the cytoplasm of the free-swimming flagellate TH17 but in dense fine

150 networks in the cytoplasm with sporadic clumps underneath the plasma membrane of the amoeboid-  
151 adhered TH17. However, the expression of  $\alpha$ -actin and  $\alpha$ -actinin was similar between the two forms of  
152 TH17 trophozoites according to western blotting (Figure 2C). The validated phalloidin binding sites  
153 are conserved in  $\alpha$ -actin of *T. vaginalis* (Figure 2-Figure Supplement 3) (36). F-actin was double-  
154 stained by TRITC-conjugated phalloidin and anti- $\alpha$ -actin antibody (Figure 2D), showing prominent F-  
155 actin and  $\alpha$ -actin signals concentrated in the juxtannuclear region, referred to as perinuclear actin cap  
156 (39), with intense staining underneath the cell membrane of the leading edge in protrusive pseudopods,  
157 and less intense staining in the cytoplasm. The signal colocalization of  $\alpha$ -actin and phalloidin had a  
158 Pearson's correlation coefficient value of 0.95 (Figure 2D, bottom panel). To evaluate F-actin assembly  
159 in cells, G-actin, F-actin, and co-sediments were fractionated, and western blotting analysis revealed  
160 an F-actin ratio of ~70% in the adherent isolate and ~30% in the nonadherent one (Figure 2E), similar  
161 to  $\alpha$ -actinin. It is speculated that F-actin polymerization is more active in the adherent than the  
162 nonadherent isolate, and that the actin assembly pattern is also distinct.

Fig. 2

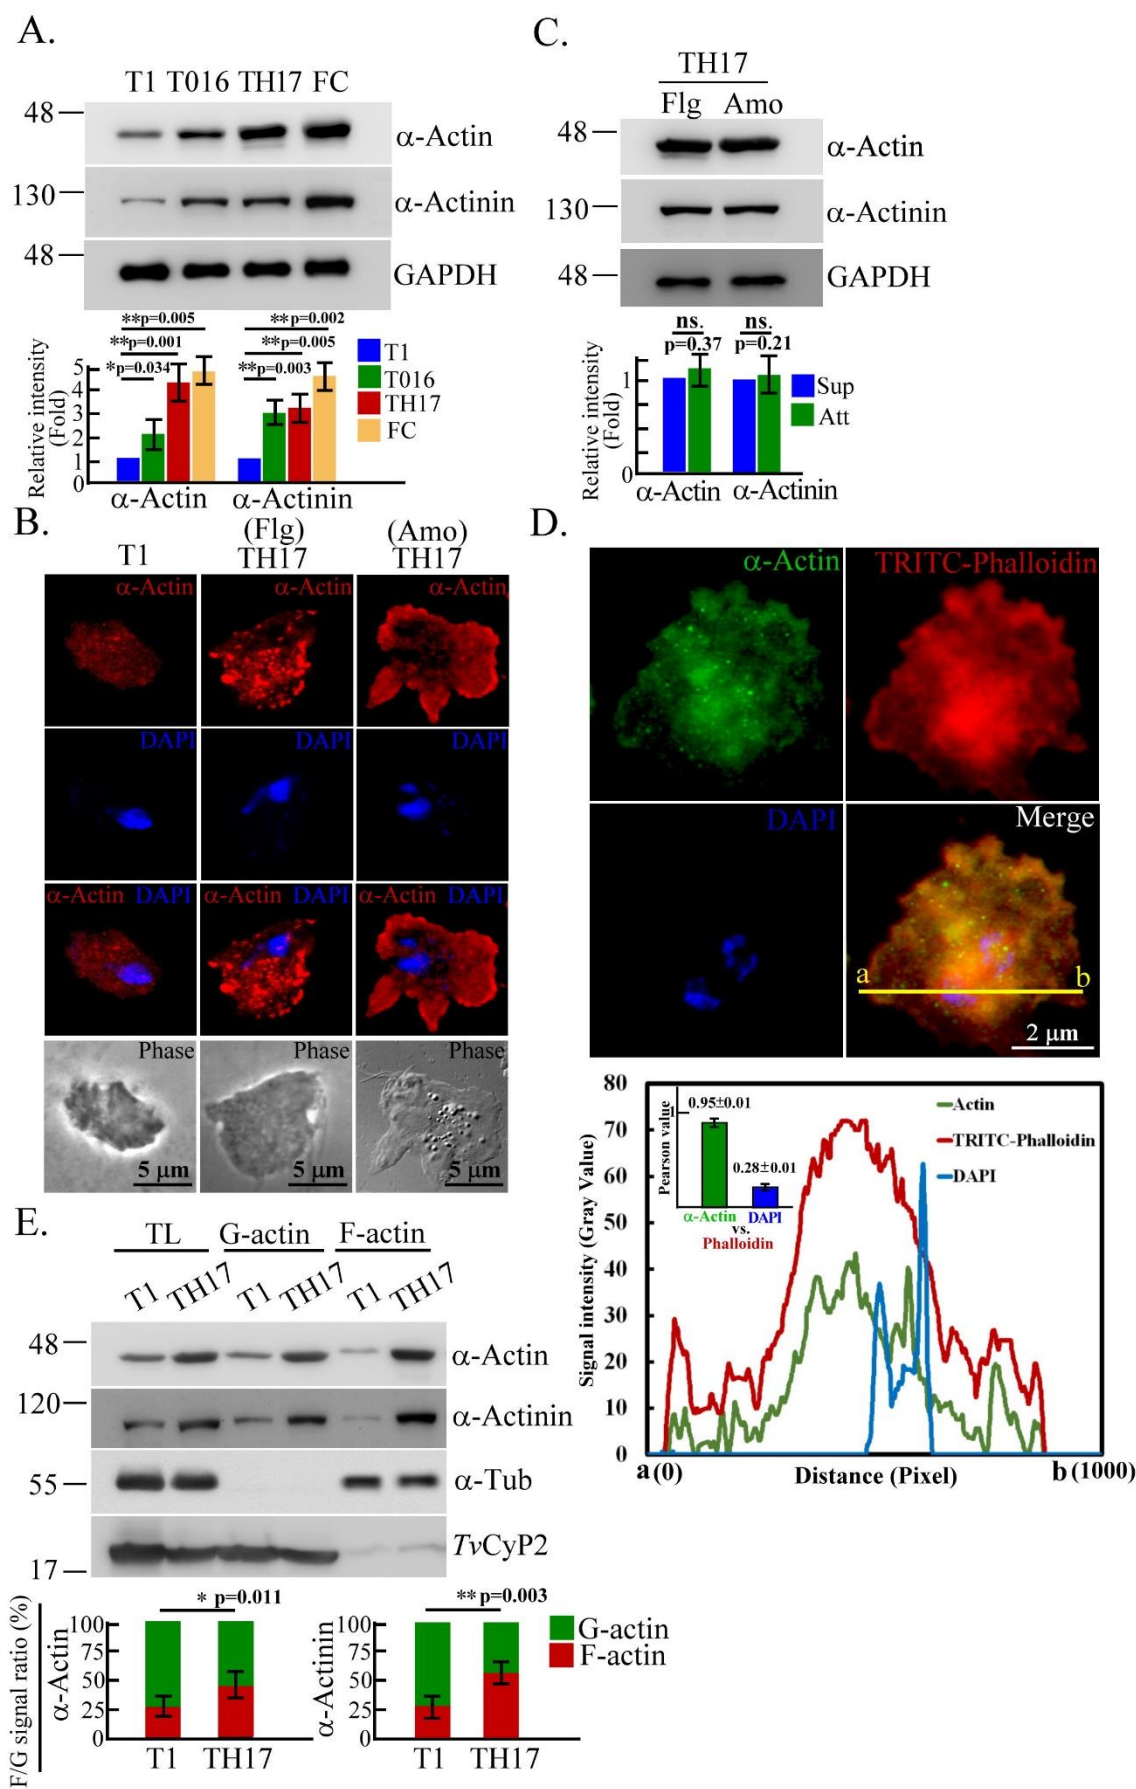

164 **Figure 2. Differential expression of actin-based machinery proteins in *T. vaginalis*.** (A.)  
165 The total lysates from T1, T016, TH17, and a fresh clinical isolate (FC) were subjected to  
166 western blotting. (B., C.) TH17 flagellates (Flg) trophozoites suspended in the medium or  
167 amoeboid (Amo) trophozoites adhered to the glass surface were sampled for IFA as shown in  
168 (B.) or western blotting as shown in (C.). Scale bar in (B.), 5  $\mu$ m. (D.) TH17 cultured on a  
169 glass slide and fixed for IFA double-staining with anti- $\alpha$ -actin antibody and TRITC-  
170 conjugated phalloidin. Signal colocalization was evaluated by a plot profile analysis to show  
171 the signal intensity distribution on the yellow line between a and b sites as shown in the  
172 diagram. The colocalization of phalloidin with  $\alpha$ -actin or DAPI was evaluated by Pearson's  
173 correlation coefficient as shown in the inset histogram. Data are presented as mean  $\pm$  SEM.  
174 Scale bar: 2  $\mu$ m. (E.) The protein lysates of actin fractionation from T1 and TH17 trophozoites  
175 were examined by western blotting. The ratio of indicated protein signal in F-actin and G-  
176 actin fractions was analyzed as shown in the histogram. All experiments were repeated three  
177 times. Data in histogram are presented as mean  $\pm$  SEM. Statistical significance with p-value  
178 for each group of data was measured by Student's t-test as indicated (n=3,  $P < 0.01^{**}$ ,  $P <$   
179  $0.05^{**}$ , and ns, no significance).

180  
181

## 182 **Actin-based morphogenesis, migration, and cytoadherence in *T. vaginalis*.**

183 Latrunculin B (LatB) binding sites are conserved in  $\alpha$ -actin of *T. vaginalis* (Figure 2-Figure  
184 Supplement 3), therefore adherent TH17 trophozoites were treated with LatB to study the role of F-  
185 actin in cytoskeleton behavior and cytoadherence. LatB treatment reduced the ratio of F-actin assembly  
186 (Figure 3A) and morphogenesis (Figure 3B) in the parasite compared to the DMSO control, as well as  
187 decreasing the wound closure rate (Figure 3C) and cytoadherence 60-min post-infection (Figure 3D),  
188 showing that F-actin disorder retarded morphogenesis, amoeboid migration, and cytoadherence of this  
189 parasite. To rule out the effects from the reputed adhesion molecules (2, 7, 10), the expression of AP65  
190 and PFO (Figure 3E), and their surface distributions (Figure 3F) were analyzed, showing that there was  
191 no change in adhesion molecules in the trophozoites with or without LatB treatment. Under IFA  
192 permeation condition, hydrogenosomal colocalization of AP65 and PFO proved their surface signal  
193 specificities (7, 10). Also, the surface localization of HA-tagged Cadherin-like protein (CLP) was not  
194 affected by LatB treatment (Figure 3G). Taken together, actin polymerization is positively associated  
195 with the parasite morphological transition, amoeboid migration, and cytoadherence. Also, LatB-  
196 inhibited cytoadherence might be independent of adhesion molecules.



Fig. 3

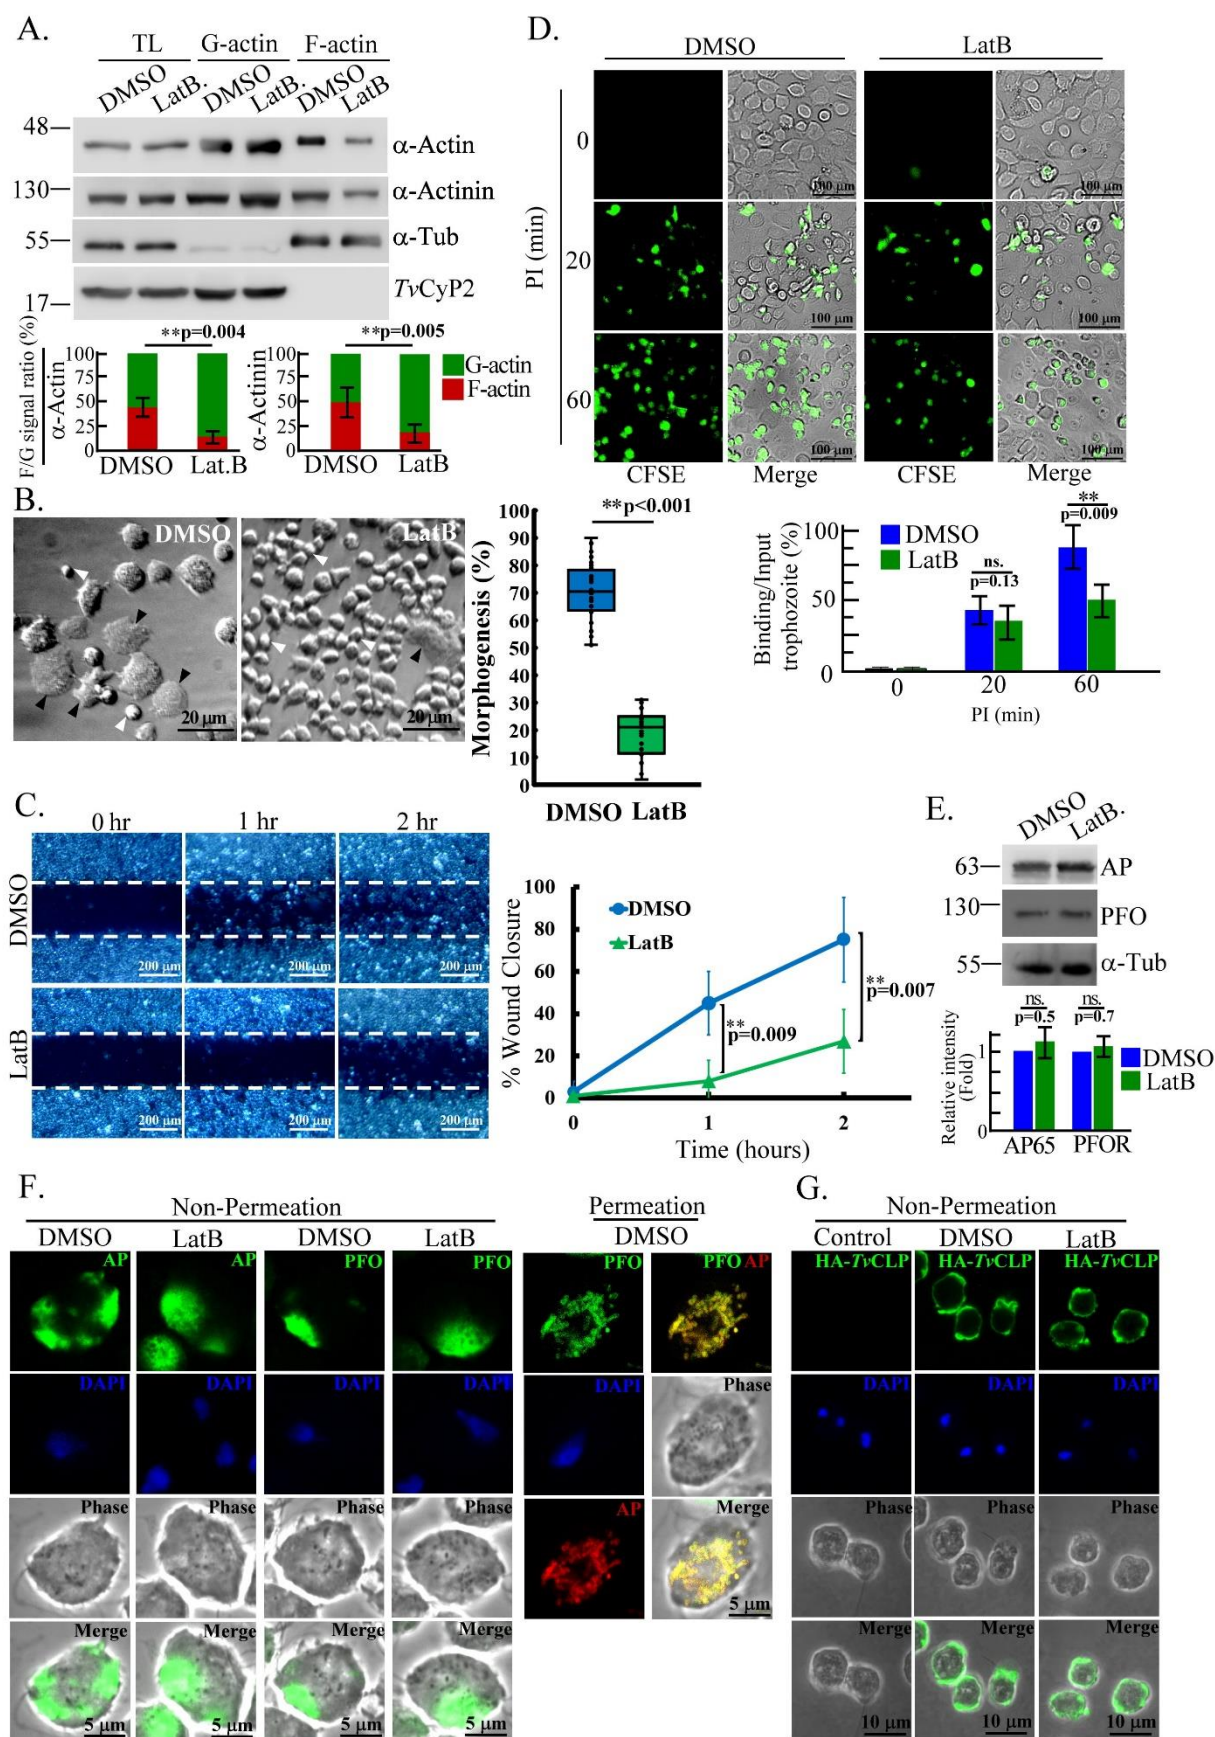

198 **Figure 3. The dysregulation of cytoskeleton-dependent behaviors in *T. vaginalis*.** TH17  
199 adherent trophozoites pretreated with DMSO or LatB were sampled for various assays. (A.)  
200 Total lysates (TL) or protein lysates of actin fractionation were subjected to western blot. The  
201 signal ratio of F-actin versus G-actin (F/G) was measured as shown in the histogram. (B.)  
202 Trophozoite morphology was observed by phase-contrast microscopy. The proportion of  
203 trophozoites in amoeboid form was measured in 600 trophozoites from 12 random  
204 microscopic fields as shown in the box and whisker plot. The black and white arrowheads  
205 respectively indicate the representative amoeboid and flagellate forms of trophozoites. Scale  
206 bar: 20  $\mu\text{m}$ . (C.) In the wound healing assay, the representative images were captured at 0, 1,  
207 and 2 hr. The wound closure rate was measured as the percentage of wound recovery area at  
208 indicated time points. The white dashed lines depict the initial wound edge. (D.) In the  
209 binding assay, the conditional trophozoites were co-cultured with *h*VECs for the time as  
210 indicated. The ratio of trophozoites binding versus input was calculated as shown in the  
211 histogram. Scale bar: 100  $\mu\text{m}$ . (E.) Total lysates from conditional trophozoites were subjected  
212 to western blotting. (F.) The fixed trophozoites with or without permeation were stained by  
213 anti-PFO and anti-AP65 antibodies for IFA. Scale bar: 5  $\mu\text{m}$ . (G.) The non-transgenic control  
214 and transgenic trophozoites overexpressing HA-*Tv*CLP were stained by anti-HA antibody for  
215 IFA under non-permeation conditions. Scale bar: 10  $\mu\text{m}$ . All experiments were repeated three  
216 times. Data in histogram and line chart are presented as mean  $\pm$  SEM. Statistical significance  
217 with p-value for each group of data was analyzed by Student's t-test as indicated ( $n=3$ ,  $P<$   
218  $0.01^{**}$ ,  $P< 0.05^{**}$ , and ns, no significance).

219  
220

### 221 ***Tv*FACP $\alpha$ as an $\alpha$ -actin effectors**

222 Since  $\alpha$ -actin is not sufficient to promote the cytoadherence in *T. vaginalis* nonadherence isolate,  
223 we attempted to identify the regulatory proteins in the  $\alpha$ -actin-associated complexes. HA-*Tv*actin was  
224 immunoprecipitated from transgenic TH17 trophozoites and subjected to mass spectrometry analysis  
225 (Figure 4A), identifying 41  $\alpha$ -actin-associated proteins with an emPAI score above 0.25 or specific in  
226 the immunoprecipitant of HA-*Tv*actin (Table 1). These proteins were classified by function into  
227 multiple cellular pathways, including cytoskeleton proteins (22%), chaperones (5%), membrane  
228 trafficking and transporter (10%), protein binding or modification (7%), DNA/RNA regulation and  
229 translation (17%), metabolism enzymes (37%), and uncharacterized proteins (2%) (Figure 4- Figure  
230 Supplement 1). The top five abundant protein identified in IP proteome were listed in Figure 4B. Bait  
231 HA-*Tv*actin was identified with an emPAI score of  $\sim 9.5$ , an F-actin CP subunit  $\alpha$  homolog, referred to  
232 as *Tv*FACP $\alpha$  (TVAG\_470230), had an emPAI score of  $\sim 9.7$  (Figure 4B) and 40% identified peptide  
233 coverage (Figure 4C), supporting the possibility of a strong protein-protein interaction between  
234 *Tv*FACP $\alpha$  and *Tv*actin. The in-silico protein sequence analysis revealed that *Tv*FACP $\alpha$  encodes 267  
235 amino acids with a molecular weight of 29.1 kDa and a PI value of 5.43 and shares 17% identity and  
236 63% similarity with CP $\alpha$  from high eukaryotes (Figure 4D). *Tv*FACP $\alpha$  contains a highly conserved

237 actin-binding domain at C-terminus spanning amino acids from 237 to 261. By a phosphorylation site  
 238 prediction algorithm (NetPhos 3.1 Generic phosphorylation prediction:  
 239 Services.healthtech.dtu.dk/service.php?NetPhos-3.1), Ser<sup>2</sup>, Ser<sup>46</sup>, Ser<sup>88</sup>, Ser<sup>106</sup>, and Ser<sup>223</sup> were  
 240 predicted as CKII phosphorylation sites. The sequence of <sup>2</sup>SESE<sup>5</sup> fits the putative CKII  
 241 phosphorylation motif (pS/pTDXE) possibly recognized by a phospho-CKII substrate antibody. In the  
 242 TrichDB database, BLAST analysis identified two CP $\alpha$  homologous proteins (TVAG\_470230 and  
 243 TVAG\_212270) with 32% sequence similarity (Figure 4-Figure Supplement 2) but whether they are  
 244 functionally redundant in this parasite remains to be studied.

245

246 (Please see the attached Table 1 file)

247 **Table 1. The list of *Tvactin*-interacted proteins identified by LC-MS/MS.** The proteins identified  
 248 by mass spectrometry with emPAI value above 0.25 or the peptides specific in the immunoprecipitant  
 249 of HA-*Tvactin* were listed.

Fig. 4

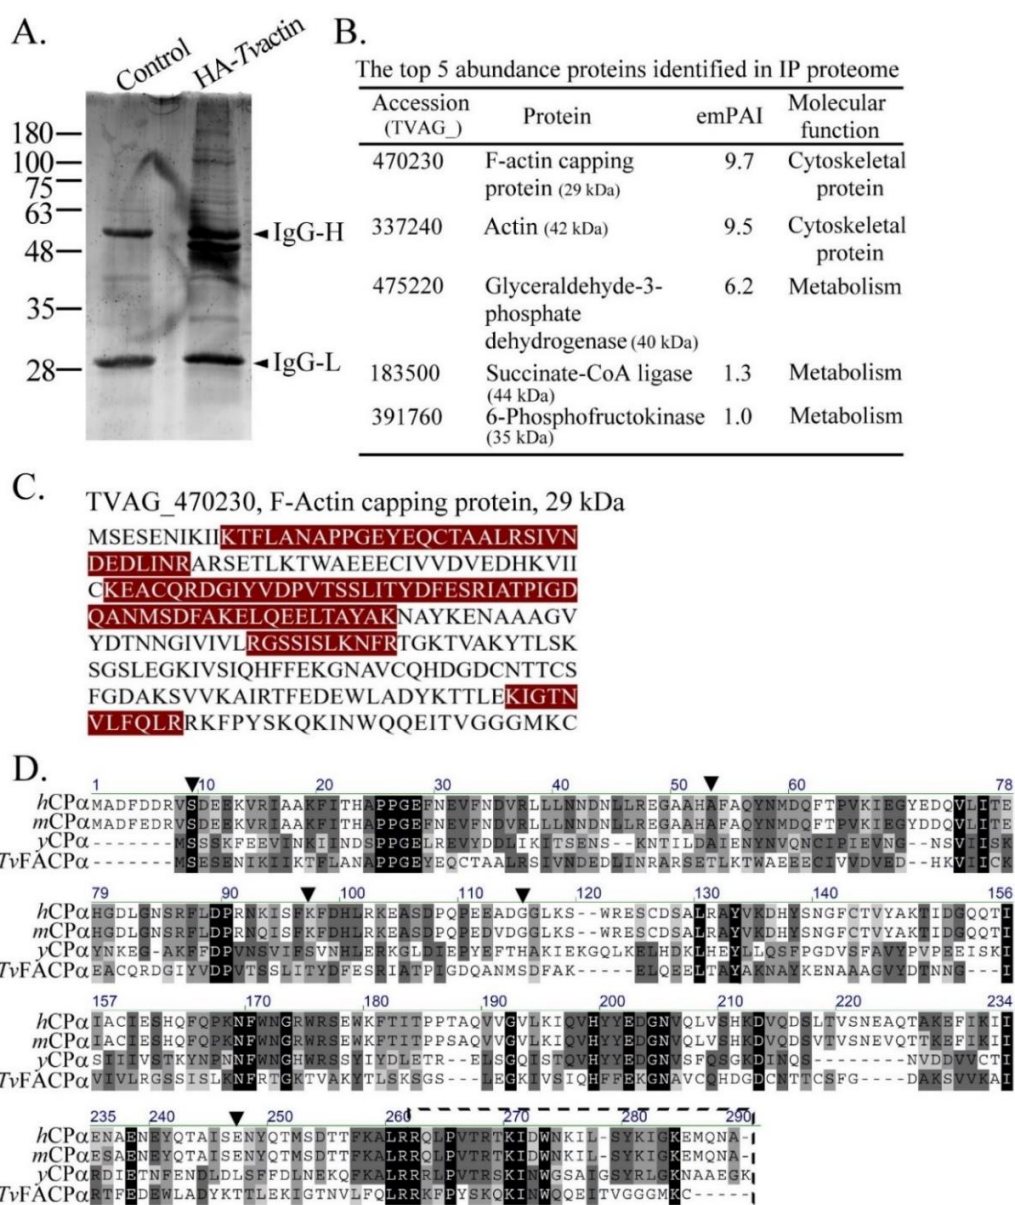

250

251 **Figure 4. Proteomic identification of actin-binding effectors.** (A.) The immunoprecipitants  
252 from non-transgenic control or transgenic TH17 trophozoites overexpressing HA-*Tv*actin  
253 were separated by SDS-PAGE, followed by SYPRO Ruby staining. (B.) In-gel tryptic digests  
254 were processed for a label-free quantitative proteomic analysis. The top five abundant  
255 proteins were listed by their emPAI in descending order. The all identified proteins were  
256 summarized in Table 1. (C.) *Tv*FACP $\alpha$ -specific peptides identified by LC-MS/MS were  
257 labeled in red to show the coverage. (D.) The full-length protein sequence of *Tv*FACP $\alpha$  was  
258 aligned with the CP $\alpha$  from human (*h*CP $\alpha$ , P52907), mouse (*m*CP $\alpha$ , P47753), and yeast (*y*CP $\alpha$ ,  
259 P28495). The conserved amino acid sequences are highlighted. The predicted Casein kinase  
260 II phosphorylation sites are indicated by downward arrowheads, and the actin-binding domain  
261 is boxed by a black dashed line.

262

263

#### 264 **The non-canonical interaction of *Tv*FACP $\alpha$ to $\alpha$ -actin**

265 Immunoprecipitation was performed to examine whether *Tv*FACP $\alpha$  forms the protein complexes  
266 with  $\alpha$ -actin in *T. vaginalis*, with two major bands at ~30 and ~32 kDa recognized by an anti-HA  
267 antibody in the total lysates. A 42-kDa  $\alpha$ -actin and a 110-kDa  $\alpha$ -actinin band were co-  
268 immunoprecipitated from the trophozoites overexpressing HA-*Tv*FACP $\alpha$  but not the non-transfectant  
269 control (Figure 5A). To further confirm the direct interaction of *Tv*FACP $\alpha$  and  $\alpha$ -actin, His-*Tv*FACP $\alpha$ ,  
270 His- $\Delta$ 237 mutant, GST and GST-*Tv*actin were purified to homogeneity for the pull-down assay  
271 (Figure 5B, left panel). When an equal amount of His-*Tv*FACP $\alpha$  and His- $\Delta$ 237 were reacted with GST  
272 or GST-*Tv*actin for the pull-down assay, the signal from His-*Tv*FACP $\alpha$  but not His- $\Delta$ 237 was pulled  
273 down with GST-*Tv*actin, showing that the c-terminal domain is vital for the direct binding of *Tv*FACP $\alpha$   
274 and  $\alpha$ -actin (Figure 5B, right panel).

275 The function of *Tv*FACP $\alpha$  in actin assembly was analyzed by an *in vitro* polymerization assay.  
276 When over ~95% G-actin polymerized into F-actin in F-buffer in the absence of His-*Tv*FACP $\alpha$  (Figure  
277 5C left panel), F-actin polymerization ratio was only ~25% in the presence of His-*Tv*FACP $\alpha$ , of which  
278 25% of His-*Tv*FACP $\alpha$  co-sedimented with F-actin. By contrast, the polymerization ratio was 75% in  
279 the presence of His- $\Delta$ 237, and less than 5% of His- $\Delta$ 237 could be co-sedimented with F-actin (Figure  
280 5C), indicating that *Tv*FACP $\alpha$  directly interacts with actin molecules to attenuate polymerization. Of  
281 note, only 25% of *Tv*FACP $\alpha$  co-sedimented with F-actin but it inhibited over ~70% F-actin formation  
282 in the polymerization assay, suggesting that *Tv*FACP $\alpha$  also binds G-actin to inhibit its polymerization.

283 To determine the kinetics of *Tv*FACP $\alpha$  binding G-actin and F-actin by a solid phase binding  
284 immunoassay, two forms of actin were reacted with various concentrations of His-*Tv*FACP $\alpha$  or His-  
285  $\Delta$ 237 mutant to measure the  $K_d$  and  $B_{max}$  values (Figure 5D). The binding signal increased  
286 with increasing concentration of His-*Tv*FACP $\alpha$  or derived mutant, and plateaued in the presence of  
287 over 20  $\mu$ M of His-*Tv*FACP $\alpha$ . The binding curves show that His-*Tv*FACP $\alpha$  binds F-actin with a  $K_d$  of  
288 8.36  $\mu$ M and  $B_{max}$  of 1.35 and G-actin with a  $K_d$  of 4.45  $\mu$ M and  $B_{max}$  of 1.5. By contrast, His- $\Delta$ 237  
289 binds both F-actin and G-actin with a similar  $B_{max}$  of ~0.5, only one-third of His-*Tv*FACP $\alpha$  (Figure 5D)

290 inset table). In contrast with the canonical F-actin binding preference for high eukaryotic CP $\alpha$ , the *in*  
 291 *vitro* assays demonstrated that *TvFACP* $\alpha$  bound G-actin with an affinity greater than F-actin to suppress  
 292 actin polymerization.

Fig. 5

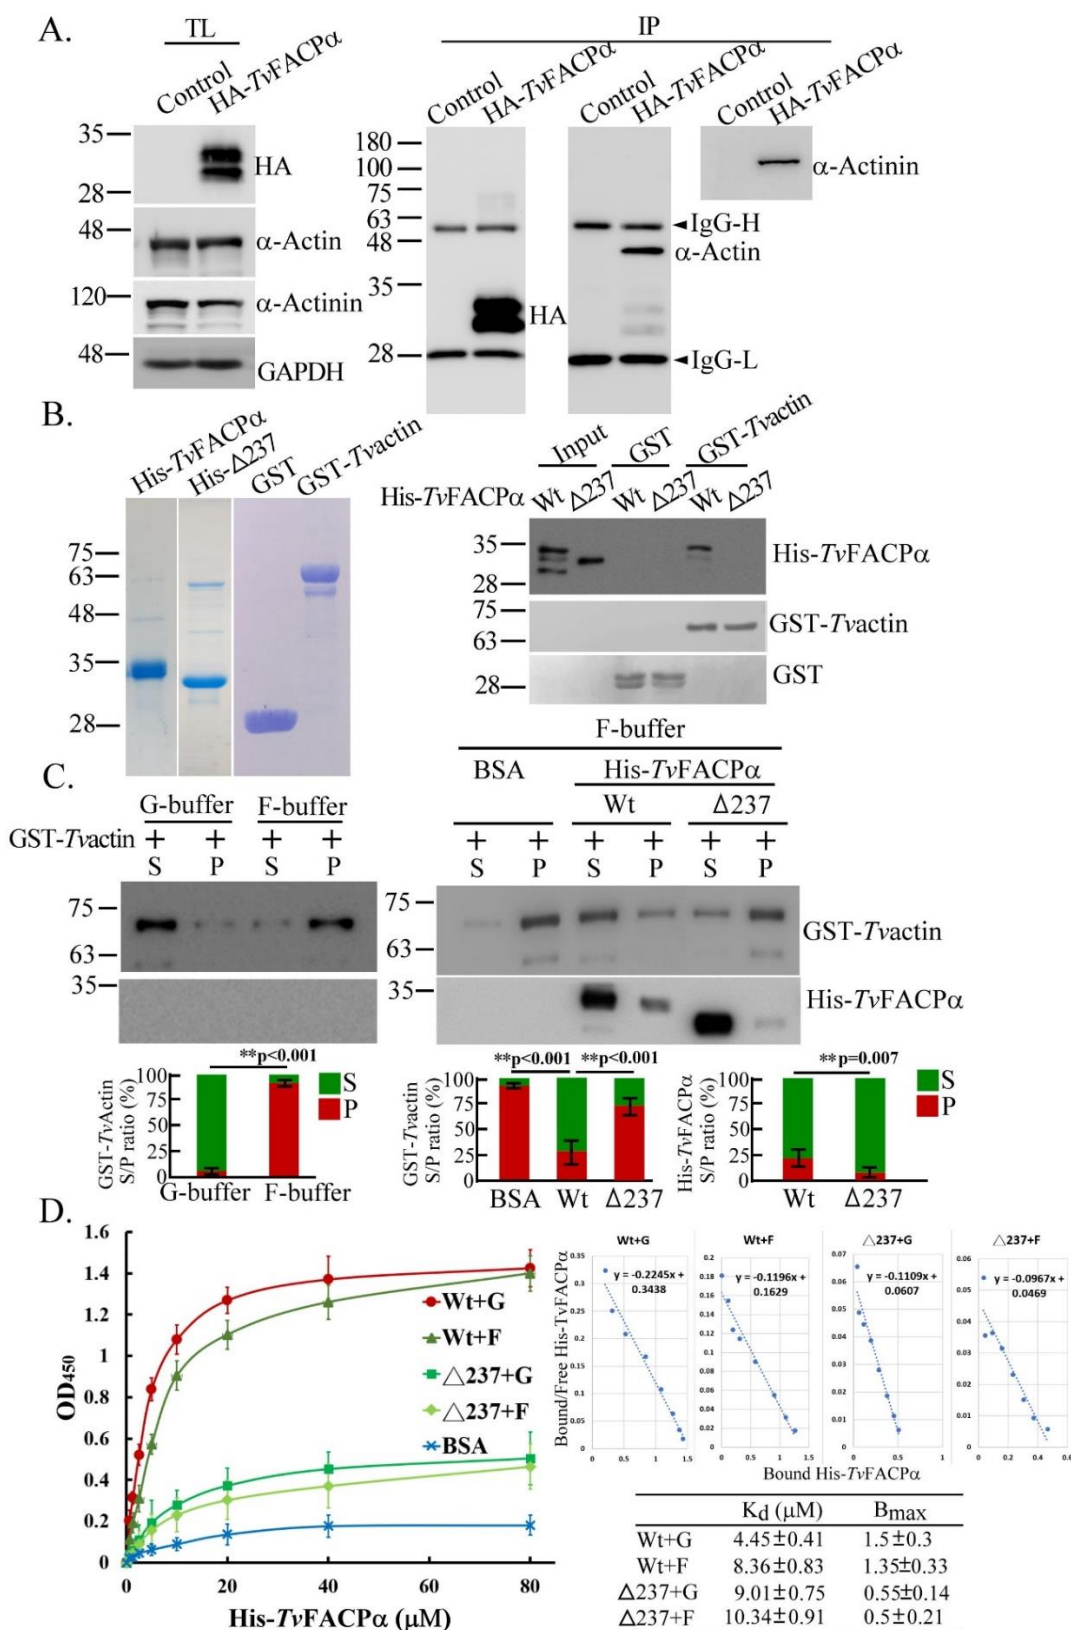

293

294 **Figure 5. Direct interaction of *Tv*FACP $\alpha$  with G-actin and F-actin.** (A.) The total lysate  
295 (TL) from non-transgenic control or transgenic TH17 trophozoites expressing HA-*Tv*FACP $\alpha$   
296 was immunoprecipitated by anti-HA antibody (IP), followed by western blotting. GAPDH  
297 was detected as the loading control. (B.) The purities of recombinant His-*Tv*FACP $\alpha$  wild type  
298 (Wt), His- $\Delta$ 237, GST, and GST-*Tv*actin were examined by SDS-PAGE with Coomassie blue  
299 staining (left panel). Equimolar GST or GST-*Tv*actin immobilized on glutathione beads was  
300 incubated with His-*Tv*FACP $\alpha$  (Wt) or His- $\Delta$ 237 mutant for the GST pull-down assay. The  
301 pull-down samples were blotted on PVDF membrane for western blotting with anti-6 $\times$ His  
302 antibody or for Ponceau S staining (right panel). 1/10 of the input protein was loaded for  
303 positive control. (C.) *In vitro* actin polymerization assay was performed to react G-actin in  
304 G- or F-buffer (left panel) or reaction in the presence of His-*Tv*FACP $\alpha$ , His- $\Delta$ 237 or BSA  
305 control (right panel). After ultracentrifugation, F-actin and its associates were isolated in the  
306 pellet (P) from G-actin in the supernatant (S), then examined with western blotting by anti-  
307  $\alpha$ -actin or anti-6 $\times$ His antibody. The signal ratio of indicated protein in the supernatant versus  
308 pellet (S/P) was quantified as shown in the histogram. (D.) The equimolar G-actin (G) and F-  
309 actin (F) coated on a 96-well microplate were incubated with various concentrations of His-  
310 *Tv*FACP $\alpha$  (Wt) or His- $\Delta$ 237 ( $\Delta$ 237) mutant. The saturation binding curve is plotted by the  
311 OD<sub>450</sub> absorbance against various concentrations of His-*Tv*FACP $\alpha$  or His- $\Delta$ 237 mutant  
312 protein to create Scatchard plots and calculates  $K_d$  and  $B_{max}$  values as summarized in the inset  
313 table. The assays were repeated three times. Data are presented as mean  $\pm$  SEM. Significant  
314 difference with p-value for each group of data was statistically analyzed by Student's t-test  
315 as indicated (n=3,  $P < 0.01^{**}$ ,  $P < 0.05^*$ , and ns, no significance).

316  
317

### 318 ***Tv*FACP $\alpha$ represses F-actin assembly in *T. vaginalis***

319 By western blotting, the anti-*Tv*FACP $\alpha$  antibody identified a ~30-kDa protein band in the total  
320 lysate from TH17 trophozoites (Figure 6A) and colocalized with TRITC-phalloidin with the Pearson's  
321 correlation coefficient value of 0.96, indicating the colocalization of *Tv*FACP $\alpha$  with F-actin in this  
322 parasite (Figure 6B). To further study if *Tv*FACP $\alpha$  regulates F-actin polymerization, HA-*Tv*FACP $\alpha$   
323 wild type or actin-binding domain deletion mutant  $\Delta$ 237 were overexpressed in TH17 trophozoites.  
324 By IFA, HA-*Tv*FACP $\alpha$  was detected as network-like structures extending extensively into the  
325 cytoplasm and slightly intense immunostaining condensed near the cell membrane (Figure 6C). In the  
326 non-transgenic control TH17,  $\alpha$ -actin was distributed in the cytoplasm as fine-dense tubular networks.  
327 However, cytoplasmic  $\alpha$ -actin was observed as numerous stubby rods with punctate signals in HA-  
328 *Tv*FACP $\alpha$ -overexpressed TH17, and the pattern in  $\Delta$ 237 transfectants was similar to that in the non-  
329 transgenic TH17 control, indicating that *Tv*FACP $\alpha$  overexpression may alter  $\alpha$ -actin organization in  
330 this parasite.

331 In western blotting, HA-*Tv*FACP $\alpha$  or  $\Delta$ 237 were overexpressed at a level ~5-fold higher than  
332 the endogenous form in the non-transgenic control, and the former inhibited endogenous *Tv*FACP $\alpha$

333 expression in the transfectant (Figure 6D), suggesting that this parasite may have a feedback  
334 mechanism to maintain cellular *TvFACP $\alpha$*  levels. Western blotting showed that the expression of  $\alpha$ -  
335 actin or  $\alpha$ -actinin did not change between transfectants (Figure 6D). Actin fractionation revealed that  
336  $\sim$ 45% F-actin co-sedimented with  $\sim$ 25% *TvFACP $\alpha$*  in the non-transgenic TH17 control. In transfectants  
337 overexpressing HA-*TvFACP $\alpha$* , the F-actin level reduced to  $\sim$ 25% but co-sedimented HA-*TvFACP $\alpha$*   
338 was  $\sim$ 2-fold higher than the endogenous form of the non-transfectant. In the  $\Delta$ 237 mutant, the F-actin  
339 ratio was slightly higher but co-sedimented  $\Delta$ 237 was lower than the non-transfectant, therefore,  
340 *TvFACP $\alpha$*  may repress actin polymerization. A similar trend was observed for  $\alpha$ -actinin. By  
341 immunoprecipitation, co-precipitated  $\alpha$ -actin and  $\alpha$ -actinin were detected in HA-*TvFACP $\alpha$*  but much  
342 less in the  $\Delta$ 237 mutant (Figure 6E), indicating that actin-binding activity is essential for *TvFACP $\alpha$*  to  
343 inhibit actin assembly.

Fig. 6

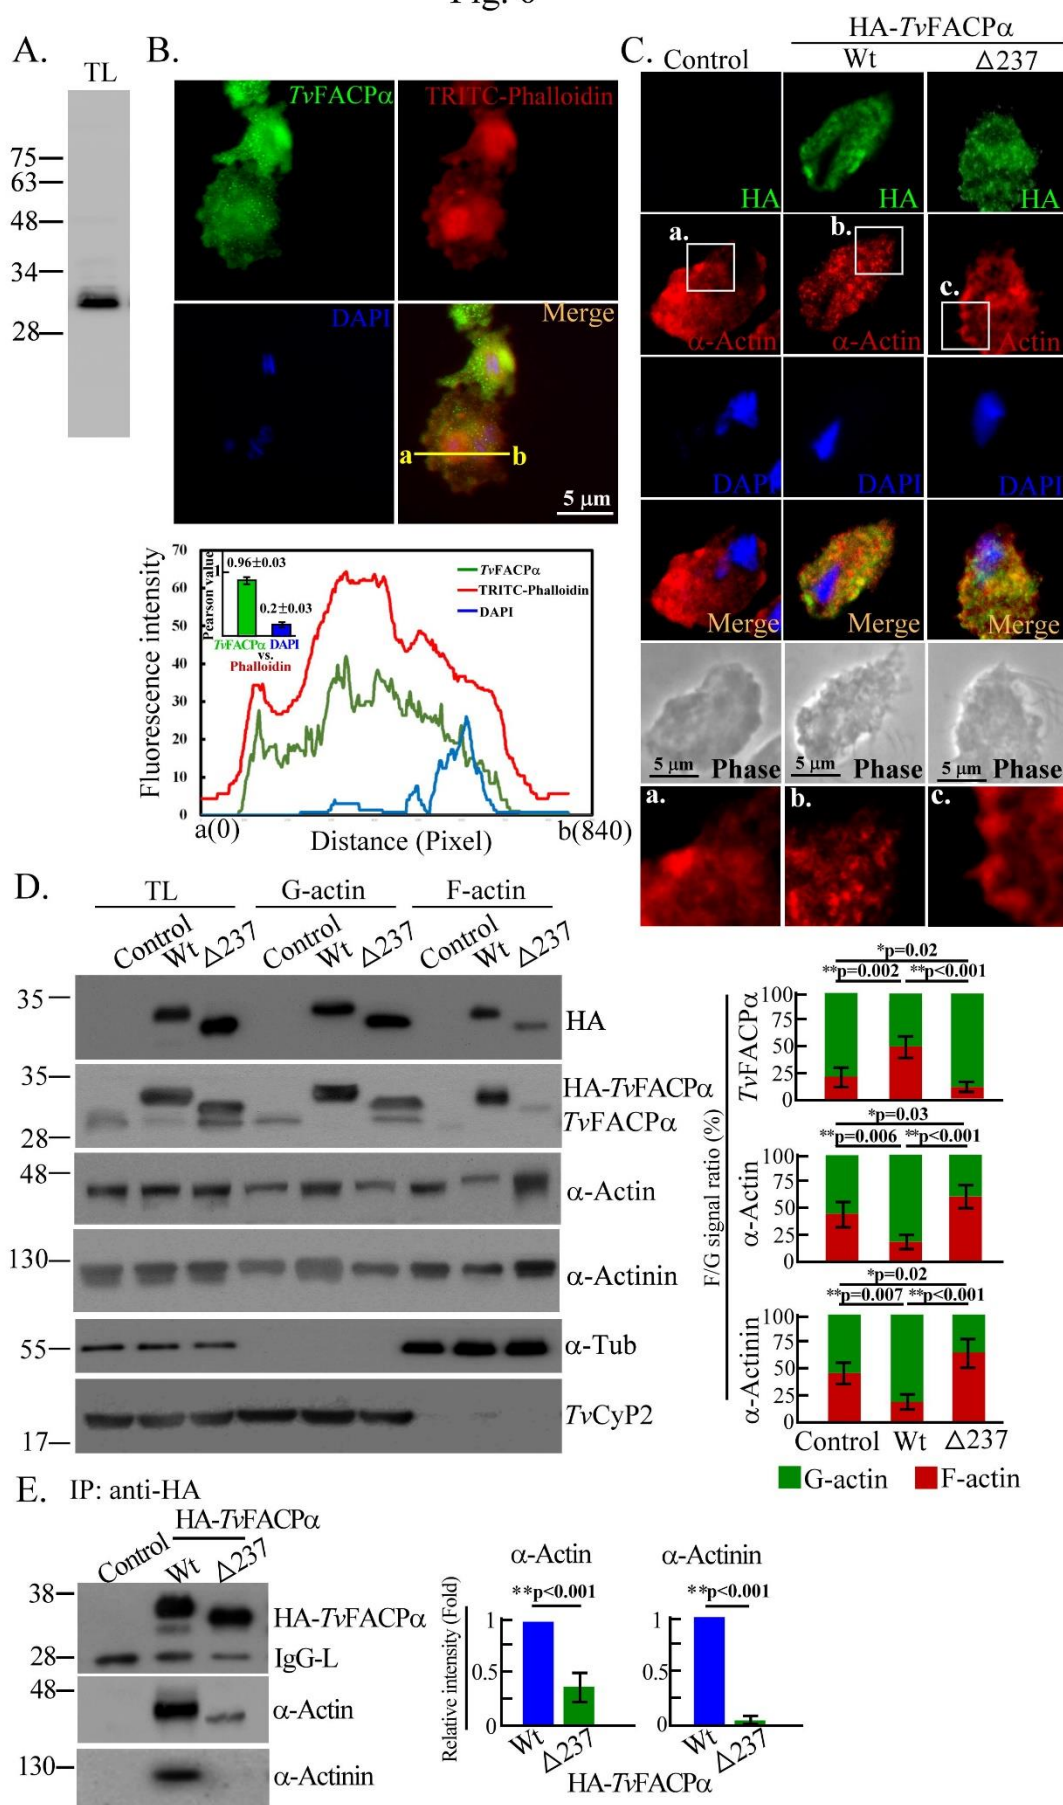



345 **Figure 6. *TvFACP $\alpha$*  binds actin to block F-actin assembly in *T. vaginalis*.** (A.) The total  
346 lysate from TH17 trophozoites was subjected to western blotting with an anti-*TvFACP $\alpha$*   
347 antibody. (B.) TH17 trophozoites cultivated on a glass slide were co-stained with anti-  
348 *TvFACP $\alpha$*  antibody and TRITC-Phalloidin. Signal was assessed by the plot profile analysis  
349 to display intensity distribution between sites a to b on the yellow line. The colocalization of  
350 phalloidin with  $\alpha$ -actin or DAPI was evaluated by Pearson correlation coefficient as shown  
351 in the inset histogram. Data are presented as mean  $\pm$  SEM. Scale bar: 5  $\mu$ m. (C.) The IFA  
352 from the non-transgenic control and transgenic TH17 trophozoites overexpressing HA-  
353 *TvFACP $\alpha$*  or  $\Delta$ 237 were detected by anti-HA and anti- $\alpha$ -actin. The magnified regions were  
354 boxed and images are shown in a-c. Scale bar: 5  $\mu$ m. (D.) Total lysates and actin fractionations  
355 from non-transgenic control and transgenic TH17 trophozoites were examined by western  
356 blotting. The ratio of indicated protein signal in F-actin and G-actin fractions (F/G) was  
357 analyzed as shown in the histogram. (E.) The total lysates from the trophozoites as shown in  
358 (D.) were immunoprecipitated with an anti-HA antibody for western blotting. The relative  
359 intensity of indicated protein signal was measured and shown in the histogram. All assays  
360 were repeated three times. Data in histogram are presented as mean  $\pm$  SEM. Statistical  
361 significance with p-value for each group of data was analyzed by Student's t-test as indicated  
362 (n=3,  $P < 0.01^{**}$ ,  $P < 0.05^{*}$ , and ns, no significance).

363  
364

### 365 ***TvFACP $\alpha$* function in actin polymerization is regulated by CKII signaling.**

366 Compared to the nonadherent T1 isolate, more *TvFACP $\alpha$*  and  $\alpha$ -actin were detected in adherent  
367 TH17 isolates but less *TvFACP $\alpha$*  co-sedimented with F-actin (Figure 7-Figure Supplement 1). The  
368 immunostaining of  $\alpha$ -actin was different between the flagellate and amoeboid forms of the adherent  
369 isolate (Figure 2B), with equal amounts of *TvFACP $\alpha$* ,  $\alpha$ -actin, and  $\alpha$ -actinin detected in the total lysates  
370 (Figure 7A). The F-actin ratio in the amoeboid trophozoites was two-fold higher than the flagellate  
371 form (Figure 7A), whereas the *TvFACP $\alpha$*  co-sedimented with F-actin in amoeboid trophozoites was  
372 two-fold lower than flagellate form. A similar trend was observed for  $\alpha$ -actinin, indicating that adhered-  
373 amoeboid *T. vaginalis* displays more active F-actin polymerization and less *TvFACP $\alpha$*  binding  $\alpha$ -actin.

374 Regarding the post-translation modifications of *TvFACP $\alpha$* , *TvFACP $\alpha$*  Ser<sup>2</sup> was previously  
375 predicted as a CKII phosphorylation sites (Figure 4D) potentially recognized by a phospho-motif  
376 (pS/pTDXE)-specific antibody, referred to as *TvFACP*(pS2). When *TvFACP $\alpha$*  was equally  
377 immunoprecipitated from the trophozoites, more *TvFACP*(pS2) but less  $\alpha$ -actin and  $\alpha$ -actinin were co-  
378 pulled down from the amoeboid trophozoites than the flagellate form (Figure 7B). Ser<sup>2</sup> hyper-  
379 phosphorylation enriched in the amoeboid form trophozoites, in which *TvFACP $\alpha$*  binding  $\alpha$ -actin or  
380  $\alpha$ -actinin was low. To confirm the role of Ser<sup>2</sup> phosphorylation in the complex formation of *TvFACP $\alpha$*   
381 and  $\alpha$ -actin, hypo-phosphorylation mimic S2A or hyper-phosphorylation mimic S2D mutant were  
382 introduced into TH17 trophozoites for actin fractionation and immunoprecipitation. The overall level  
383 of  $\alpha$ -actin and  $\alpha$ -actinin were similar in the total lysates from *TvFACP $\alpha$* , S2A, and S2D transfectants.

384 Compared to the non-transgenic control, both HA-*TvFACP* $\alpha$  and S2A overexpression repressed F-actin  
385 levels in the transfectants, with higher levels of co-sedimented HA-*TvFACP* $\alpha$  or S2A in the F-actin  
386 fraction (Figure 7C). By contrast, a similar level of F-actin was detected in the non-transfectant and  
387 S2D mutants but co-sedimented S2D in the F-actin fraction was lower than HA-*TvFACP* $\alpha$  (Figure 7D).  
388 Similar results were obtained for  $\alpha$ -actinin. Furthermore,  $\alpha$ -actin signals co-immunoprecipitated from  
389 the S2A and S2D mutant were three-fold higher and 70% lower respectively than HA-*TvFACP* $\alpha$   
390 (Figures 7E and 7F), with the low signal intensity of  $\alpha$ -actin co-immunoprecipitated with  $\Delta$ 237 mutant,  
391 implying that Ser<sup>2</sup> phosphorylation is crucial for the actin-binding activity of *TvFACP* $\alpha$ . Meanwhile,  
392 the low intensity of *TvFACP*(pS2) signal precipitated from  $\Delta$ 237 mutant implying that the actin-  
393 binding domain integrity might be important for Ser<sup>2</sup> phosphorylation. Ser<sup>2</sup> phosphorylation is a major  
394 signal for the dissociation of *TvFACP* $\alpha$  and  $\alpha$ -actin. The undetectable *TvFACP*(pS2) signal in the S2A  
395 or S2D mutant proves the antibody specificity.

396 To verify whether Ser<sup>2</sup> phosphorylation is regulated by CKII signaling, TH17 trophozoites  
397 overexpressing HA-*TvFACP* $\alpha$  were treated with DMSO or TBB for immunoprecipitation and actin  
398 fractionation, showing that the overall expression of HA-*TvFACP* $\alpha$  or  $\alpha$ -actin was not influenced by  
399 TBB treatment. When an equal amount of HA-*TvFACP* $\alpha$  was immunoprecipitated from the  
400 trophozoites treated with or without TBB, decreasing *TvFACP*(pS2) but increasing  $\alpha$ -actin signals were  
401 detected in the co-immunoprecipitants from the parasite treated by TBB (Figure 7G). Furthermore, the  
402 overall expression of *TvFACP* $\alpha$ ,  $\alpha$ -actin, and  $\alpha$ -actinin remained constant in TH17 trophozoites with or  
403 without TBB treatment, and when F-actin in TBB-treated parasite was inhibited to one-third of the  
404 basal level, the *TvFACP* $\alpha$  co-sedimented with F-actin was three-fold higher than the DMSO control  
405 (Figure 7H). In summary, CKII-dependent Ser<sup>2</sup> phosphorylation triggers dissociation of *TvFACP* $\alpha$  and  
406  $\alpha$ -actin to evoke actin polymerization.

Fig. 7

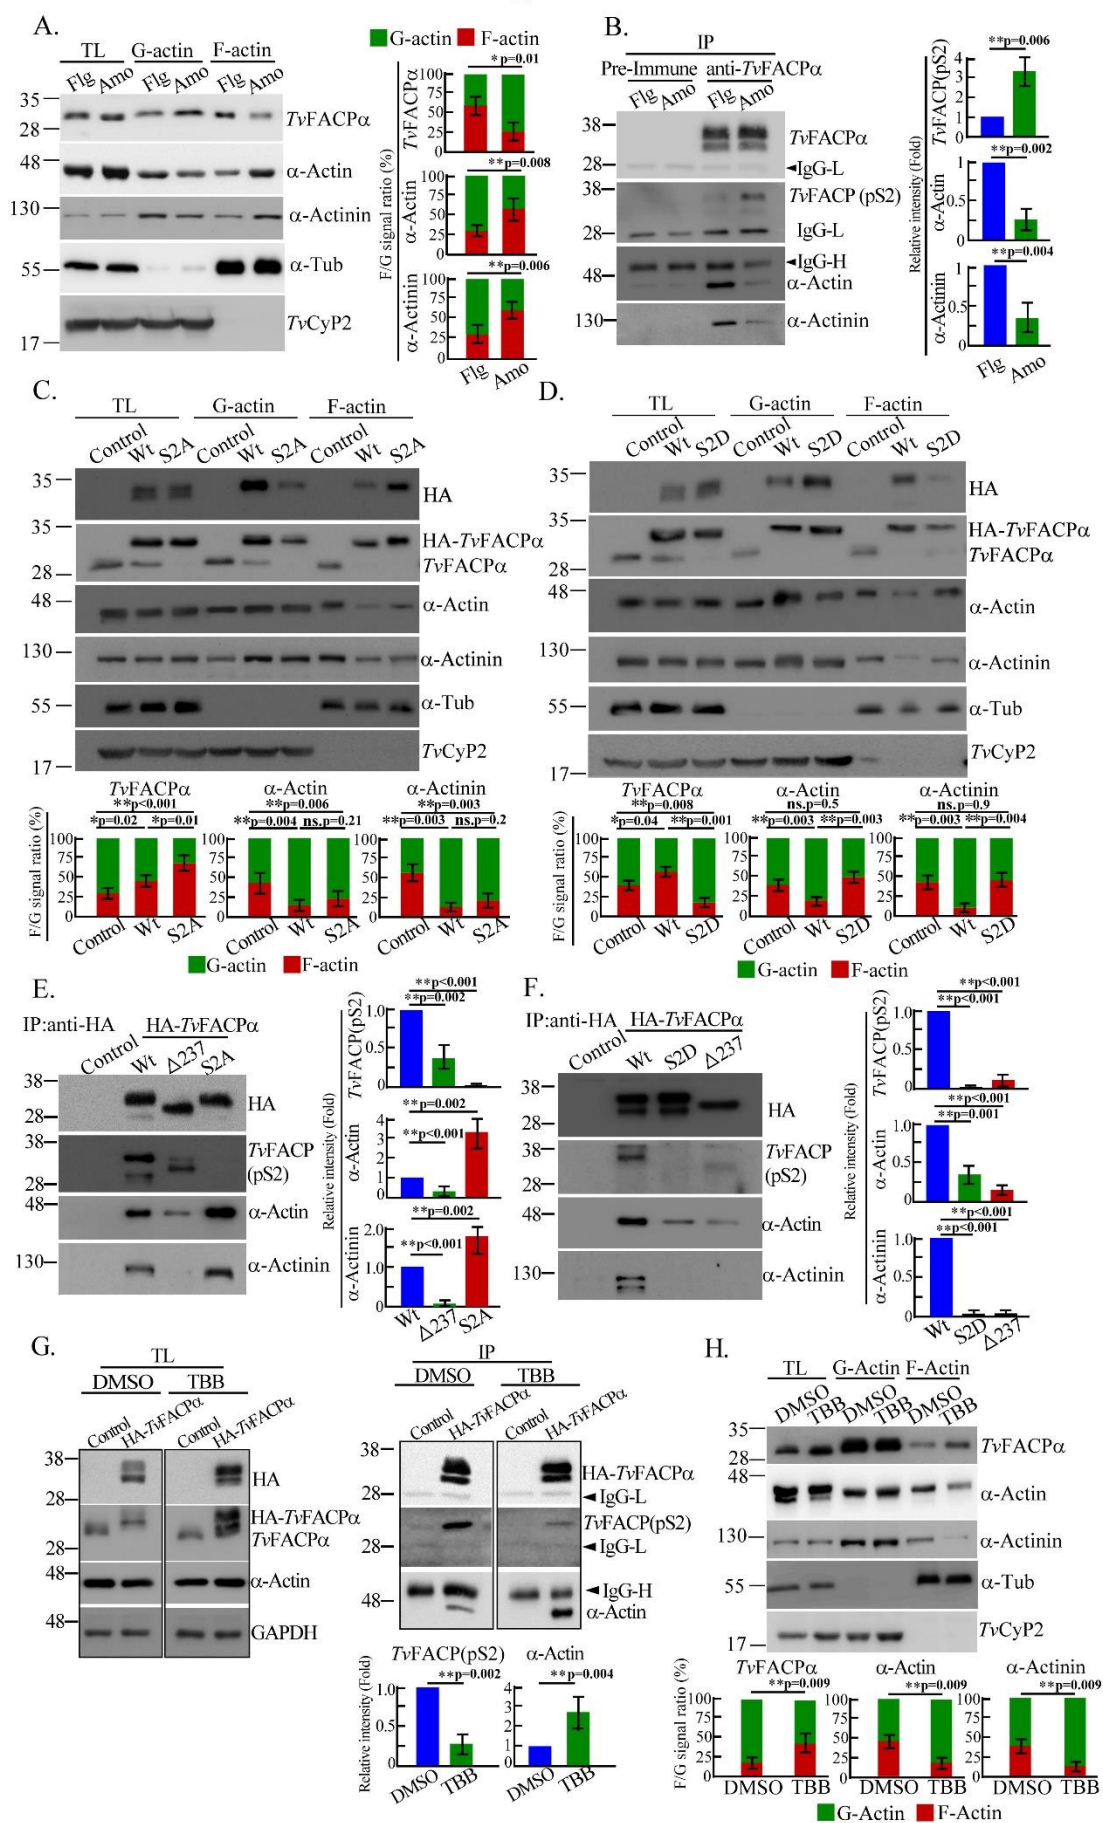

408 **Figure 7. CKII signaling regulates actin-binding of TvFACP $\alpha$ .** (A.) Total lysates from  
409 TH17 trophozoites in the flagellate (Flg) and amoeboid (Amo) forms were fractionated to  
410 determine the ratio of indicated protein signal in F-actin to G-actin (F/G) by western blotting.  
411 (B.) The immunoprecipitants from total lysates from (A.) by anti-TvFACP $\alpha$  antibody were  
412 examined by western blotting. (C., D.) Total lysates from the non-transgenic control or TH17  
413 trophozoites overexpressing HA-TvFACP $\alpha$  and S2A as shown in (C.), or S2D as shown in  
414 (D.), were fractionated for western blotting. The ratio of indicated protein signal from F-actin  
415 and G-actin fractions (F/G) was analyzed as shown in the histogram. (E., F.) The total lysates  
416 from trophozoites overexpressing HA-TvFACP $\alpha$  and S2A as shown in (E.) or S2D as shown  
417 in (F.), were immunoprecipitated by an anti-HA antibody for western blotting. The relative  
418 intensities of indicated signals were quantified as shown in the histograms. (G.) The total  
419 lysates from the non-transgenic control or HA-TvFACP $\alpha$ -overexpressed TH17 trophozoites  
420 with DMSO or TBB treatment were sampled for western blotting (left panel) or  
421 immunoprecipitation by anti-HA antibody (right panel). The relative intensities of signals  
422 were quantified as shown in the histogram. (H.) TH17 trophozoites treated with DMSO or  
423 TBB were fractionated for western blotting. The ratio of indicated protein signal in F-actin  
424 and G-actin fractions (F/G) was quantified as shown in the histogram. All assays were  
425 repeated three times. Data are presented as mean  $\pm$  SEM. Statistical significance with p-value  
426 for each group of data was measured by Student's t-test as indicated (n=3,  $P < 0.01^{**}$ ,  
427  $P < 0.05^{**}$ , and ns, no significance).

428  
429

### 430 **TvFACP $\alpha$ in morphogenesis and cytoadherence of *T. vaginalis*.**

431 To examine the role of Ser<sup>2</sup> phosphorylation on cytoskeleton behaviors, the morphogenesis of  
432 TH17 trophozoites overexpressing HA-TvFACP $\alpha$  and derived mutants was observed by phase-contrast  
433 microscopy. Morphogenesis in the trophozoites overexpressing HA-TvFACP $\alpha$  and S2A was reduced  
434 to ~20% compared to ~70% morphogenesis in the non-transgenic control, whereas it was restored to  
435 ~70% in the  $\Delta 237$  and S2D mutants (Figure 8A). TBB treatment also reduced the morphological  
436 transformation of TH17 trophozoites from ~80% in DMSO control cells to ~30% in the TBB-treated  
437 trophozoites. Notably, the TBB effect inhibiting morphogenesis was abolished in the S2D transfectant,  
438 suggesting that CKII-dependent Ser<sup>2</sup> phosphorylation in TvFACP $\alpha$  is crucial to the regulation of  
439 morphogenesis in *T. vaginalis* (Figure 8B). The differential cytoadherence of various HA-TvFACP $\alpha$   
440 transfectants was monitored over time, showing that the non-transgenic TH17 trophozoites achieved  
441 ~100% cytoadherence 60-min post-infection, reducing to ~40% in HA-TvFACP $\alpha$  and S2A  
442 transfectants and increasing to ~80% in  $\Delta 237$  and S2D transfectants. TBB treatment also significantly  
443 reduced the cytoadherence 60-min post-infection and this effect was abrogated in the S2D transfectant  
444 (Figure 8D). Notably, the overexpression of HA-TvFACP and related mutants or TBB treatment did  
445 not affect the cytoadherence at the initial 20-min infection (Figure 8C). These findings were consistent  
446 with our previous observation that LatB only perturbed cytoadherence from the staging 60-min post-

447 infection (Figure 3D). The data strongly supports that CKII-dependent Ser<sup>2</sup> phosphorylation regulates  
 448 *TvFACPα* function in cytoskeleton-mediated morphogenesis and consequential cytoadherence of *T.*  
 449 *vaginalis*. The morphogenesis capacity of this parasite tightly correlates its cytoadherence.

Fig. 8

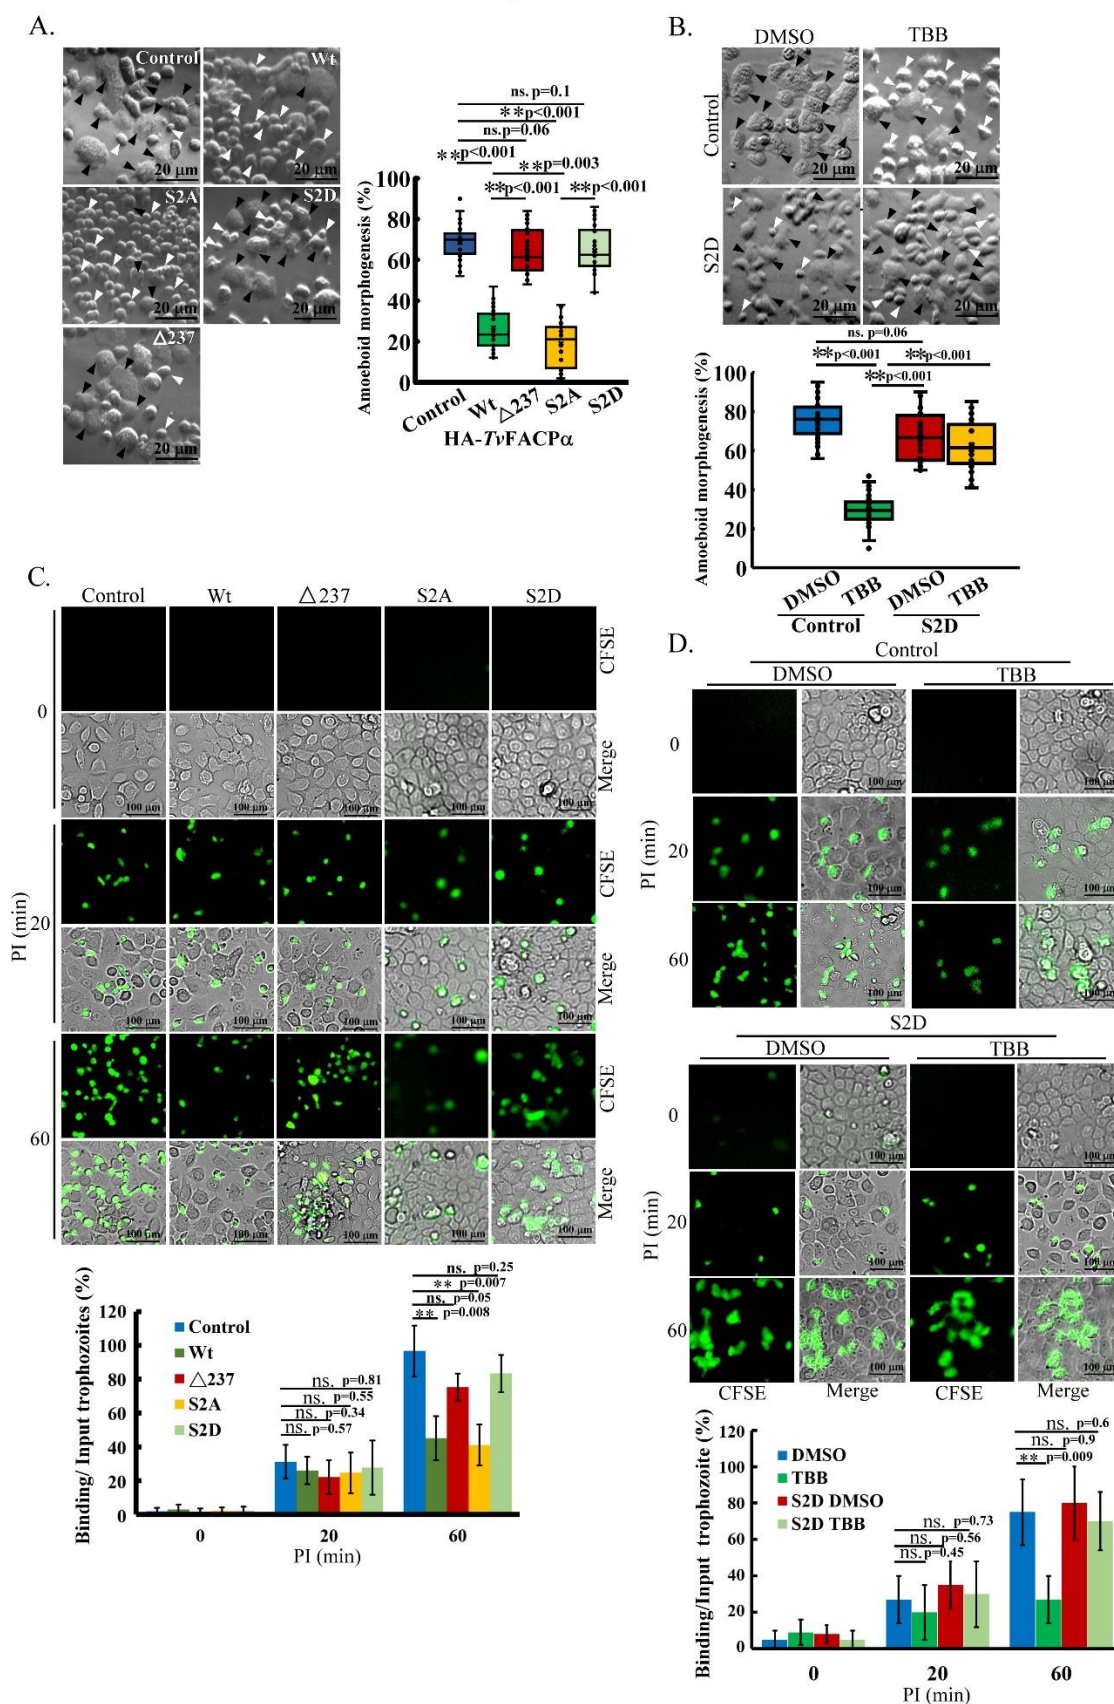

451 **Figure 8. *Tv*FACP $\alpha$  regulates actin-related morphogenesis and cytoadherence in *T.***  
452 ***vaginalis*.** (A., B.) Non-transgenic control and transgenic TH17 trophozoites overexpressing  
453 HA-*Tv*FACP $\alpha$ ,  $\Delta$ 237, S2A, and S2D as shown in (A.), and the non-transgenic TH17  
454 trophozoites and those overexpressing S2D with DMSO and TBB as shown in (B.), were  
455 cultured on the glass slide for 1 hr. The cell morphology was recorded by phase-contrast  
456 microscopy. The proportion of parasites in amoeboid form was measured in ~600  
457 trophozoites from 12 microscopic fields as shown in the box and whisker plots. The black  
458 and white arrowheads respectively indicate the representative amoeboid and flagellate forms  
459 of trophozoites. Scale bar: 20  $\mu$ m. (C., D.) For the cytoadherence binding assay, the CFSE-  
460 labeled trophozoites overexpressing HA-*Tv*FACP $\alpha$  and derived mutants as shown in (C.), or  
461 the non-transgenic or S2D transgenic TH17 trophozoites pretreated with DMSO and TBB as  
462 shown in (D.), were co-cultured with *h*VECs for the indicated timeframes. After removing  
463 unbound trophozoites, the ratios of those binding versus input was measured as shown in the  
464 histograms. Scale bar: 100  $\mu$ m. All assays were repeated three times. Data in histogram are  
465 presented as mean  $\pm$  SEM. Statistical significance with p-value for each group of data was  
466 analyzed by Student's t-test as indicated (n=3,  $P < 0.01^{**}$ ,  $P < 0.05^{**}$ , and ns, no significance).

467  
468

#### 469 **The function of *Tv*FACP $\alpha$ in amoeboid migration.**

470 The conversion of morphology and motility is the dominant features in adherent isolates (Video  
471 1) and retarded by LatB (Figure 3C), so we investigated the role of *Tv*FACP $\alpha$  in amoeboid migration.  
472 Since cytoskeletal disorder retarded the morphogenesis and reduced the adherent activity of *T.*  
473 *vaginalis*, the conditional trophozoites had to be sufficiently cultured in the T25 flask until forming a  
474 confluent parasite monolayer for the wound heal assay. The wound recovery rate was significantly  
475 suppressed in the TH17 trophozoites overexpressing HA-*Tv*FACP $\alpha$  but the rate was similar in the non-  
476 transgenic control and  $\Delta$ 237 mutant, indicating that actin-binding activity is essential for *Tv*FACP $\alpha$   
477 to reduce the amoeboid migration (Figure 9A). Also, the wound recovery rate in the non-transgenic  
478 parasite was inhibited by TBB to a similar level to the HA-*Tv*FACP $\alpha$  transfectant. By contrast, the  
479 wound closure rate in the S2D mutant was similar to the non-transgenic parasite and not influenced by  
480 TBB treatment (Figure 9B), revealing that the S2D mutant counteracted the TBB inhibitory effect on  
481 amoeboid migration. This observation indicates that CKII-dependent Ser<sup>2</sup> phosphorylation might play  
482 a key role in *Tv*FACP $\alpha$ -regulated amoeboid migration.

483

#### 484 ***Tv*FACP $\alpha$ regulates motility switching in *T. vaginalis*.**

485 Next, we tested whether parasite motility is changed with the morphology transition using the  
486 trans-well system (Figure 9C). The relative GAPDH signal in the western blotting indicates the relative  
487 amount of migratory trophozoites between the bottom wells and top inserts. When GAPDH expression  
488 was equal in the input trophozoites, the HA signal was also similar between the transfectants. Focusing  
489 GAPDH signal from the bottom well of the 30-min trans-well plate, HA-*Tv*FACP $\alpha$  was higher but

490  $\Delta 237$  and S2D mutants were lower than the non-transgenic control, revealing that more trophozoites  
 491 with HA-*TvFACP $\alpha$*  overexpression migrated into the bottom well in a short time (Figure 9D). As  
 492 observed by microscopy, the trophozoites in the bottom well displayed the morphology at the free-  
 493 swimming flagellate form (Figure 9-Figure Supplement 1), suggesting that HA-*TvFACP $\alpha$*   
 494 overexpression may retain the parasite in the flagellate form with faster movement driven by motile  
 495 flagellum. The motility conversion involved actin binding activity regulated by Ser<sup>2</sup> phosphorylation.  
 496 TBB inhibited Ser<sup>2</sup> phosphorylation in *TvFACP $\alpha$*  (Figure 7G), with the GAPDH signal from the TBB-  
 497 treated trophozoites in the bottom well higher than in the DMSO-treated trophozoites (Figure 9D).  
 498 Together, *TvFACP $\alpha$*  Ser<sup>2</sup> hypo-phosphorylation retarded amoeboid migration in the adhered  
 499 trophozoites but expanded the population of free trophozoites that rapidly moved via flagellar  
 500 locomotion (Figure 9E).

Fig. 9

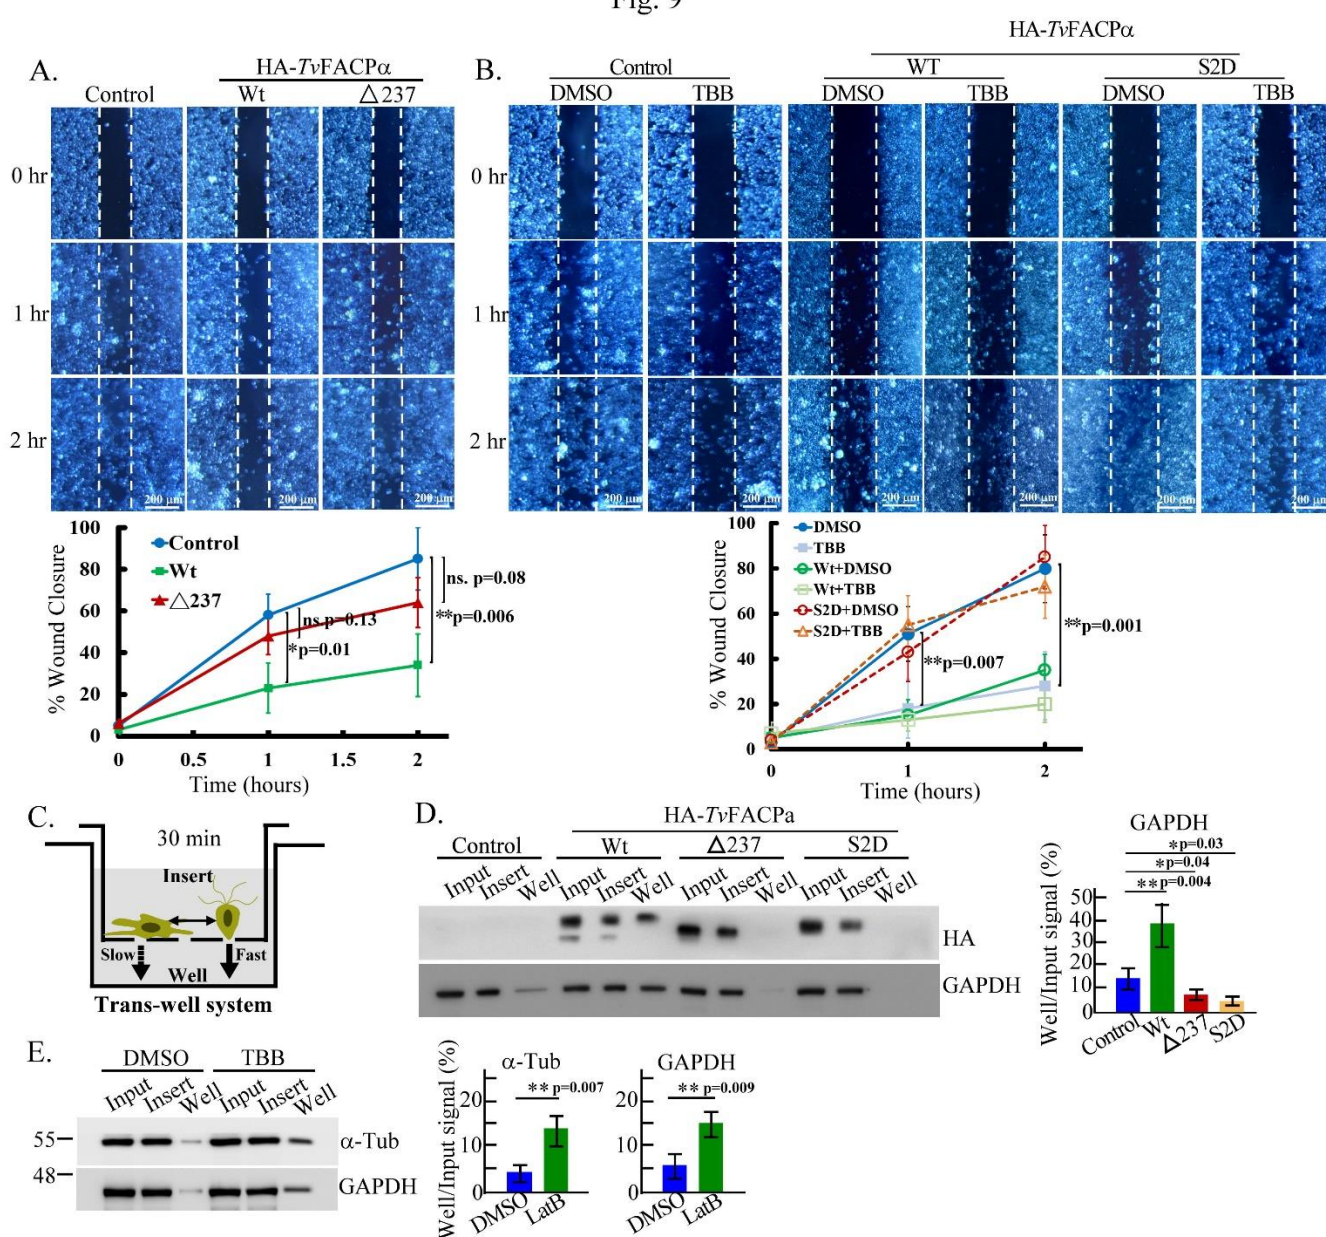

501

502

**Figure 9. *TvFACP $\alpha$*  regulates amoeboid migration and motility switching of *T. vaginalis*.**

503 (A., B.) The migrations of non-transgenic control and TH17 trophozoites overexpressing HA-  
504 *TvFACP $\alpha$*  and  $\Delta 237$  in (A.), those overexpressing HA-*TvFACP $\alpha$*  and S2D with DMSO or  
505 TBB treatment in (B.), were evaluated by a scratch wound healing assay. The representative  
506 images showing wound closure were captured at 0, 1, and 2 hr, and the closure rate was  
507 measured by the percentage of wound recovery area at indicated time points as shown in the  
508 line charts. The white dash lines mark the wound scratched boundaries. Scale bar: 200  $\mu\text{m}$ .  
509 (C.) A schematic diagram illustrates the working principle of a trans-well system applied to  
510 assess migration. Within a short interval, the free trophozoites swim by flagellar locomotion  
511 to pass through the boundary membrane faster than crawling by pseudopodia migration. (D.,  
512 E.) The migrations of TH17 trophozoites overexpressing HA-*TvFACP $\alpha$* ,  $\Delta 237$ , and S2D in  
513 (D.), TH17 trophozoites treated with DMSO and TBB in (E.), were evaluated by trans-well  
514 assay. The relative intensities of signals in the bottom well were evaluated by western blotting  
515 and quantified as shown in the histograms. All assays were repeated three times. Data are  
516 presented as mean  $\pm$  SEM. Statistical significance with p-value for each group of data was  
517 statistically measured by Student's t-test as indicated (n=3,  $P < 0.01^{**}$ ,  $P < 0.05^{**}$ , and ns, no  
518 significance).

519  
520

## 521 Discussion

522 *TvFACP $\alpha$*  was identified as an actin-binding protein that suppressed actin polymerization via the  
523 direct interaction with G-actin monomers and F-actin polymers. Furthermore, CKII-dependent  
524 signaling plays a key in the switch from morphology and motility. These cytoskeleton-mediated  
525 behaviors are crucial for optimizing the cytoadherence and population spread of this parasite. In the  
526 human urogenital tract, the intermittent flushing action of body fluid generates a mechanical barrier to  
527 either impair or eliminate the retention of uropathogenic microbes, therefore switching to the opportune  
528 motility mode to instantly counteract the environmental challenges or physical defenses would be  
529 beneficial for *T. vaginalis* colonization (37).

530 Unfortunately, the real-time tracking system for fluorescence protein within a living parasite did  
531 not work in our assay system, so the overall actin assembly and cytoskeleton activities were evaluated  
532 by western blotting and IFA to show the relevance of *TvFACP $\alpha$*  and actin dynamics in the adherent  
533 trophozoites under a steady-state condition.

534 The DNA sequences of the *tvfacpa* gene from nonadherent and adherent *T. vaginalis* isolates share  
535 100% identity (38), thus the differential cytoskeleton behaviors between isolates are unlikely to be  
536 attributed to sequence polymorphism in *TvFACP $\alpha$* . Meanwhile,  $\alpha$ -actin overexpression dose not  
537 promote adherence in the nonadherent isolate, thus cytoskeleton-dependent cytoadherence is unlikely  
538 to be determined by one single molecule.

539 Compared to the nonadherent T1 isolate, more *TvFACP $\alpha$*  and  $\alpha$ -actin were detected in adherent  
540 TH17 isolates but less *TvFACP $\alpha$*  co-sedimented with F-actin (Figure 7-Figure Supplement 1), possibly  
541 explaining why the adherent isolate displays more active cytoskeleton behaviors than the nonadherent



542 isolate. Furthermore, the adherent isolate may require a larger *Tv*FACP $\alpha$  reservoir to immediately  
543 modulate cytoskeleton dynamics in response to sudden environmental challenges.

544 The perinuclear actin cap was observed in the trophozoite with dividing nuclei. One of the known  
545 functions of the perinuclear actin cap is to govern nuclear location and movement during nuclear  
546 division (39), therefore F-actin may function in the nuclear division of this parasite. When there was  
547 colocalization of *Tv*FACP $\alpha$  and F-actin at the leading edge of the extending pseudopodia, there was  
548 less colocalization observed near the actin cap (Figure 6), suggesting that F-actin bundle assembly in  
549 peripheral motile structure is presumably manipulated by *Tv*FACP $\alpha$ , distinct from that in the central  
550 juxtannuclear actin cap. Human CKIP-1 protein containing pleckstrin homology domain directs CP $\alpha$  to  
551 the cell membrane periphery and bridges the interaction of CP $\alpha$  with CKII kinase to co-regulate cell  
552 morphology (33, 34).

553 *Tv*FACP $\alpha$  Ser<sup>2</sup> identified as a CKII phosphorylation site is conserved with Ser<sup>9</sup> on human or yeast  
554 CP $\alpha$  (Figure 4D) (33, 34, 40). Human CP $\alpha$  Ser<sup>9</sup> has been demonstrated to be phosphorylated by CKII  
555 kinase but does not directly affect actin assembly (33), indicating that the regulation of human CP $\alpha$  is  
556 divergent to *Tv*FACP $\alpha$  in this early evolutionary-branched protozoan. Also, yeast CP $\alpha$  Ser<sup>9</sup> resides in  
557 the stalk domain but not the actin-binding domain, thus Ser<sup>2</sup> phosphorylation may not directly interfere  
558 with *Tv*FACP $\alpha$  actin-binding, instead altering function by an allosteric effect or binding with other CP $\alpha$   
559 interacting partners to co-regulate actin dynamics (40).

560 Iron was previously found to trigger a protein kinase A-dependent signaling to activate the Myb3  
561 transcription factor sequential phosphorylation and ubiquitination essential to its nuclear translocation  
562 (48). However, iron was observed to slightly change *T. vaginalis* morphogenesis long-term cultured in  
563 iron-restricted growth medium, so whether iron triggers the CKII pathway to regulate cytoskeleton  
564 dynamics in this parasite remains to be elucidated.

565 When the gain- or loss-of-function assay was employed to study the role of Ser<sup>2</sup> phosphorylation,  
566 F-actin assembly was repressed in the hypo-phosphorylation mimic S2A mutant but restored to near  
567 the basal level instead of exceeding it in the hyper-phosphorylation mimic S2D mutant. This implies  
568 the existence of additional pathways promoting F-actin assembly under our tested conditions. For  
569 example, *Tv*Fim1 protein reveals an opposite function to *Tv*FACP $\alpha$  to accelerate F-actin polymerization  
570 that favors phagocytosis and migration in *T. vaginalis* (35). In TrichDB database, BLAST analysis  
571 identified two CP $\alpha$  homologous proteins (TVAG\_470230 and TVAG\_212270) with 32% sequence  
572 similarity (Figure 4-Figure Supplement 2) but whether they are functionally redundant in this parasite  
573 remains to be studied.

574 A previous proteomic study reported that surface fibronectin-binding might change actin  
575 expression in this parasite. In this report,  $\alpha$ -actin expression was constant in the free-swimming  
576 flagellate or adhered-amoeboid forms, implying less involvement of fibronectin-binding in the  
577 morphogenesis and cytoadherence under our test condition (15).

578 Mass spectrometry data revealed GAPDH as a major interacting partner of *Tv*actin. In chicken  
579 neuron cells, GAPDH acts as a chaperone for  $\alpha$ -actin and co-translocates with  $\alpha$ -actin to specialized  
580 axon sites for polymerization (41). In yeast, GAPDH associates with  $\alpha$ -actin and RpB7 subunit of RNA

581 polymerase II to regulate transcription (42, 43). The significance of GAPDH complexed with the actin  
582 cytoskeleton in *T. vaginalis* remains to be studied.

583 The EC<sub>50</sub> of TBB is varied in different cell types. Numerous CKII alpha subunit (CKII $\alpha$ ) proteins  
584 predicted from TrichDB shared less sequence consensus in the TBB binding pocket to high eukaryotic  
585 CKII $\alpha$  (38, 44), possibly explaining why Ser<sup>2</sup> phosphorylation and downstream cytoskeleton activities  
586 were partially inhibited by TBB treatment. Again, the S2D mutation was unable to promote actin  
587 polymerization efficiency beyond that of the non-transgenic parasite, suggesting that actin filament  
588 growth might be modulated by additional pathways.

589 The opportunistic amoeba, *Naegleria fowleri*, exists in three life stages: flagellate trophozoite,  
590 amoeba trophozoite, and cyst. Multiple environmental factors, like growth temperature, cation level,  
591 steroid hormone, or chemical agents, affect the flagellate to amoeba transformation (45, 46, 47). In *T.*  
592 *vaginalis*, other than the contact-dependent effect (14, 18, 35), the factors that trigger the morphological  
593 transition are virtually unknown. Overexpression of actin increases the phagocytosis and cytotoxicity  
594 of *N. fowleri* (20) but does not affect *T. vaginalis*. (Figure 2-Figure Supplement 1). Although they have  
595 the cognate behavior of flagellate-amoeba conversion, their regulation in these two protozoa is distinct.  
596 The immediate conversion to motility may allow the parasite to rapidly respond to environmental  
597 fluctuations or flushing by humoral fluid flow in the urogenital tract (37).

598 LatB had little effect on the initial 20-min cytoadherence and surface expression of adhesion  
599 molecules, AP, PFO, and cadherin, thus we speculate that the adhesion molecules on the cell surface  
600 may play roles in the initial cytoadherence, thereafter actin-based morphogenesis reinforces  
601 cytoadherence at the later stage of cytoadherence (49). In our previous study, *TvCyp2* was  
602 demonstrated to shuttle between intracellular membrane compartments, involving the endoplasmic  
603 reticulum, Golgi apparatus, and hydrogenosome before translocation onto the cell membrane (50). The  
604 cell surface presentation of adhesion proteins may occur through similar endomembrane trafficking  
605 routes.

606

## 607 **Conclusion**

608 In conclusion, *TvFACP $\alpha$*  directly binds G- or F-actin to block actin filament extension (Figure  
609 10), with Ser<sup>2</sup> phosphorylation on *TvFACP $\alpha$*  decreasing actin-binding activity and triggering actin  
610 polymerization. In adherent *T. vaginalis* trophozoites, *TvFACP $\alpha$*  spatially colocalizes with actin  
611 molecules at the membrane periphery of motile protrusive pseudopodia, where *TvFACP $\alpha$*  regulates  
612 actin assembly dynamics to control the cytoskeleton behaviors of motility switching, amoeboid  
613 migration, or cytoadherence consequent to the morphogenesis. The Ser<sup>2</sup> phosphorylation status is  
614 crucial for *TvFACP $\alpha$*  function in the regulation of cytoskeleton behaviors. The cytoskeleton-driven  
615 activities are also inhibited by a cytoskeleton (LatB) or CKII (TBB) inhibitor. These findings may  
616 provide potential therapeutic targets for cytoskeleton aspects to prevent *T. vaginalis* colonization and  
617 transmission.

Fig. 10

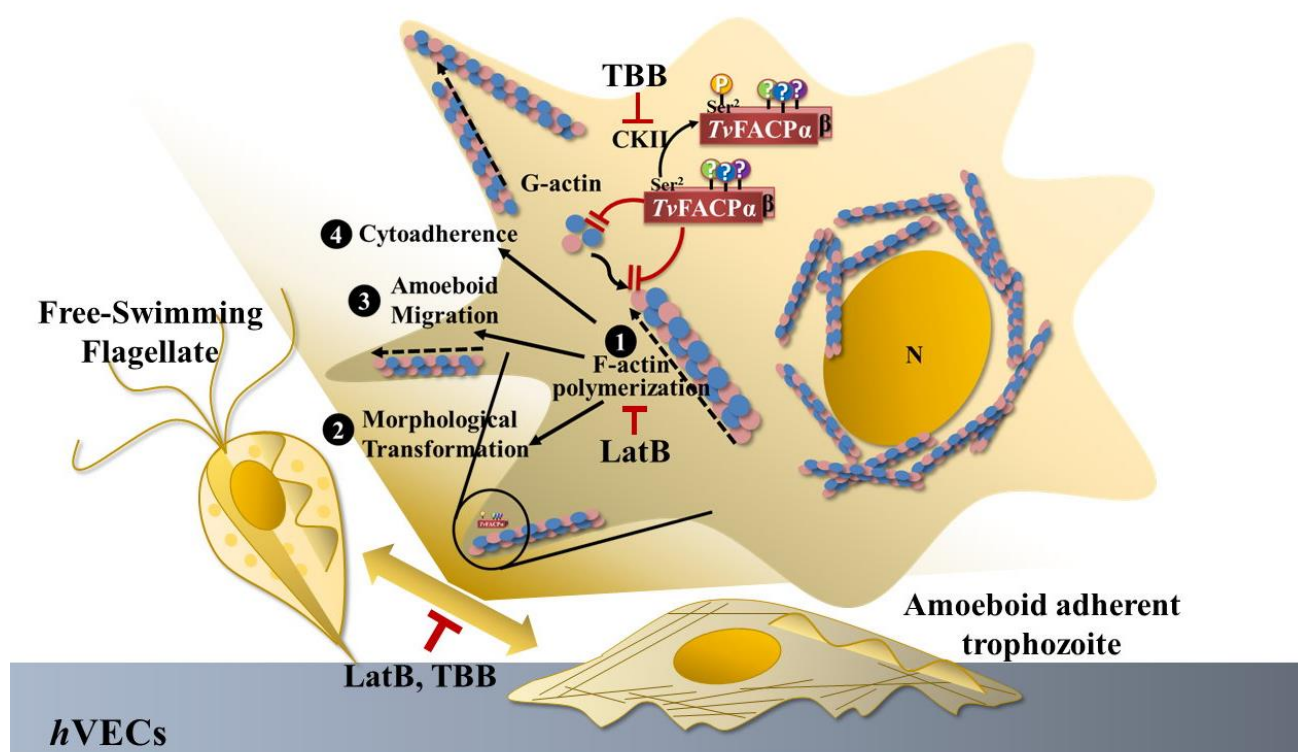

618

619

620

621

622

623

624

625

626

627

628

629

630

631

632

633

634

635

636

637

638

**Figure 10. The proposed model for *TvFACPα* function and regulation.** *TvFACPα* is an actin-binding protein containing a c-terminal actin-binding domain and CKII-dependent Ser<sup>2</sup> phosphorylation. *TvFACPα* directly interacts with G-actin and F-actin through the actin-binding domain, and Ser<sup>2</sup> phosphorylation is the essential signal triggering dissociation of *TvFACPα* and  $\alpha$ -actin. *TvFACPα* colocalizes with actin at the leading edge of the peripheral motile protrusions inhibiting actin filament polymerization ①, leading to the diminishment of the flagellate-amoeboid transformation and motility switching ②, amoeboid migration ③, and the cytoadherence ④ in this parasite. As expected, the above behaviors were also inhibited by TBB and LatB, supporting the significance of CKII and cytoskeleton activities on parasitism. Tight adherence and immediate migration conversion may be approaches adopted by this parasite to counteract environmental fluctuations or evade the host defense. This novel mechanism of *T. vaginalis* cytoadherence may provide new therapeutic targets for future treatment.

## Materials and Methods

### Cell cultures

*T. vaginalis* trophozoites were cultured in TYI medium at 37°C (48). Two *T. vaginalis* isolates, nonadherent T1 (48) and adherent TH17, were used in this study. T1 with only flagellate trophozoites freely swim in the medium suspension. TH17 displayed vigorous morphogenesis and tightly adhered

639 on glass surface of culture tube. Once the void surface is saturated by adhered trophozoites, the  
640 unbound parasite at the flagellate form freely swims in the medium suspension (Figure 1 and Videos 1  
641 and 2). The flagellate trophozoites in the medium suspension and adherent trophozoite on the culture  
642 tube surface were collected for analysis as described below. Human vaginal epithelium cells (*h*VECs,  
643 VK2/E6E7) were cultivated in Keratinocyte-Serum Free medium (Thermo Fisher Scientific,  
644 Massachusetts, USA) at 37°C in 5% CO<sub>2</sub> as the suggestion by ATCC.

645

#### 646 **Lysate preparation from adherent-amoeboid and nonadherent-flagellate trophozoites.**

647 Approximately  $2 \times 10^7$  trophozoites from TH17 adherent isolate were inoculated into culture tube  
648 with 15 ml of medium and incubated at 37°C for 2 hr. The free-trophozoites in suspension were  
649 transferred to a new tube and recovered by centrifugation. The cell pellet was lysed in 1 ml lysis buffer  
650 (1% Triton X-100, 1× Protease inhibitor cocktail, 1× Phosphatase inhibitor cocktail, 100 μg ml<sup>-1</sup> TLCK,  
651 5 mM EDTA, in TBS). The trophozoites adhering to the glass tube were directly lysed by adding 1 ml  
652 lysis buffer and vigorously vortexing for 5 min at 4°C.

653

#### 654 **Plasmid construction**

655 The full-length coding sequence of the *tvfacpa* gene (TVAG\_470230) was amplified from *T.*  
656 *vaginalis* genomic DNA using the primer pair of *TvFACPα*-BamHI-5' and *TvFACPα*-XhoI-3'. The PCR  
657 product was gel-purified, then digested by BamHI/XhoI, and ligated into BamHI/XhoI-predigested  
658 Flp-HA-*TvCyp2* or pET28a backbone plasmid to obtain Flp-HA-*TvFACPα* or pET28-His-*TvFACPα*  
659 plasmid. Following a similar procedure, the DNA fragments were amplified from Flp-HA-*TvFACPα*  
660 individually using the primer pairs, *TvFACPα*S2A-5' and *TvFACPα*-XhoI-3' for the S2A mutation,  
661 *TvFACPα*S2D-5' and *TvFACPα*-XhoI-3' for the S2D mutation, and *TvFACPα*-BamHI-5' and  
662 *TvFACPα*Δ237-3' for the actin-binding domain deletion mutant (Δ237). The PCR products were gel-  
663 purified and subcloned into Flp-HA-*TvFACPα* or pET28a backbone with BamHI/XhoI sites to generate  
664 Flp-HA-*TvFACPα*(S2A), Flp-HA-*TvFACPα*(S2D), Flp-HA-*TvFACPα*(Δ237), or pET28-His-  
665 *TvFACPα*(Δ237) plasmid.

666 To express HA-tagged α-actin in *T. vaginalis* or glutathione S-transferase (GST) fused-α-actin  
667 for the GST pull-down or actin polymerization assays, the full-length coding sequence of the *tvactin*  
668 gene (TVAG\_337240) was amplified from *T. vaginalis* genomic DNA by the primer pair of *Tvactin*-  
669 BamHI-5' and *Tvactin*-XhoI-3'. The gel-purified PCR product was digested with BamHI and XhoI,  
670 then ligated into BamHI and XhoI-predigested Flp-HA-*TvFACPα* or pGST-*TvCyp2* plasmid (50)  
671 to generate Flp-HA-*Tvactin*, or pGST-*Tvactin* plasmid.

672 The *TvCadherin* expression plasmid was constructed, the coding sequence of the *tvcadherin* gene  
673 (TVAG\_393390) (2) was amplified from *T. vaginalis* genomic DNA by the primer pair of *TvCadherin*-  
674 BamHI-5' and *TvCadherin*-XhoI-3', and subcloned into Flp-HA-*TvFACPα* backbone vector with  
675 *BamHI* and *XhoI* sites to produce Flp-HA-*TvCadherin* plasmid.

676

677

678 The primer oligonucleotides used in this study.

| 679 | Primer                                  | Sequence                                              |
|-----|-----------------------------------------|-------------------------------------------------------|
| 680 |                                         |                                                       |
| 681 | <i>Tv</i> FACP $\alpha$ -BamHI-5'       | (5' <u>AAGGATCC</u> ATGAGCGAGAGCGAAAAT3')             |
| 682 | <i>Tv</i> FACP $\alpha$ -XhoI-3'        | (5' <u>AACTCGAG</u> TTAGCACTTCATGCCACC3')             |
| 683 | <i>Tv</i> FACP $\alpha$ $\Delta$ 237-3' | (5' <u>AACTCGAG</u> ACGAAGCTGGAAAAGAAC3')             |
| 684 | <i>Tv</i> FACP $\alpha$ S2A-5'          | (5' <u>AAGGATCC</u> ATG <i>gcc</i> GAGAGCGAAAATATC3') |
| 685 | <i>Tv</i> FACP $\alpha$ S2D-5'          | (5' <u>AAGGATCC</u> ATG <i>gat</i> GAGAGCGAAAATAT3')  |
| 686 | <i>Tv</i> actin-BamHI-5'                | (5' <u>AAGGATCC</u> ATGGCTGAAGAAGACGTTTCAGAC3')       |
| 687 | <i>Tv</i> actin-XhoI-3'                 | (5' <u>AACTCGAG</u> TTAGAAGCACTTGCGGTGGAC3')          |
| 688 | <i>Tv</i> Cadherin-BamHI-5'             | (5' <u>GGATCC</u> ATGATTTGGACTTTTTTATTGCAG3')         |
| 689 | <i>Tv</i> Cadherin-XhoI-3'              | (5' <u>CTCGAG</u> TTACTTTCTAAGCCAAAGAATTATTACT-3')    |

690 The restriction sites are underlined, and mutation sites are indicated in lowercase italics.

691

### 692 **Cytoadherence binding assay**

693 *h*VECs was cultured in a 24-well plate to an 85% confluent monolayer. Mid-log phase *T. vaginalis*  
694 pre-labeled with 5  $\mu$ M of carboxyfluorescein diacetate succinimidyl ester dye (CFSE; CellTrace<sup>TM</sup>,  
695 Thermo Fisher Scientific, Massachusetts, USA), were inoculated by a multiplicity of infection (MOI)  
696 of 2:1 into *h*VECs culture. At the specific time point, the medium was aspirated and unbound  
697 trophozoites were removed by washing two times with PBS for 5 min each. Samples were fixed in 4%  
698 formaldehyde for fluorescence microscopy.

699

### 700 **Real-time microscopy**

701 The activity of trophozoites on the confluent *h*VECs monolayer in a glass-bottom culture dish was  
702 monitored in real-time by confocal microscopy (LSM-700, Zeiss, Oberkochen, Germany) under a  
703 phase-contrast mode with the sampling rate at one frame per 15 sec over time as indicated.

704

### 705 **Inhibitor treatment**

706 1  $\mu$ M of LatB (Sigma-Aldrich, Massachusetts, USA) or 250  $\mu$ M of TBB (Sigma-Aldrich,  
707 Massachusetts, USA) was added into the *T. vaginalis* culture and incubated at 37°C for 2 hr before  
708 analysis.

709

### 710 **Morphology analysis**

711 Trophozoites were cultured on a glass slide in a humid chamber at 37°C for 1 hr and the  
712 morphology was observed by phase-contrast microscopy (CKX31, Olympus, Tokyo, Japan). The  
713 percentage of flagellate or amoeboid form was measured from 600 trophozoites within 12 random  
714 microscopic fields.

715

### 716 **Immunofluorescence assay (IFA)**

717 *T. vaginalis* was fixed with 4% formaldehyde and permeabilized with 0.2% Triton X-100. The  
718 samples were then incubated with the primary antibodies: rabbit anti- $\alpha$ -actin (200 $\times$ , GenScript, New  
719 Jersey, USA), mouse anti- $\alpha$ -actin (400 $\times$ , Abcam Ac-40, Cambridge, UK), mouse anti-HA (200 $\times$ ,  
720 Sigma-Aldrich HA-7, Massachusetts, USA), mouse anti-AP65 (7), rabbit anti-PFO (10), rabbit anti-  
721 *TvFACP $\alpha$* , followed by reaction with FITC or Cy3-conjugated goat anti-mouse or rabbit IgG secondary  
722 antibodies (200 $\times$ , Jackson ImmunoResearch, Pennsylvania, USA). The specimens were air-dried and  
723 mounted in medium with DAPI (Vector laboratories, California, USA) for observation by confocal  
724 microscopy (LSM-700, Zeiss, Oberkochen, Germany).

725

### 726 **F-actin staining**

727 Trophozoites were fixed with 4% formaldehyde, then permeabilized with 0.2% Triton X-100. The  
728 sample was incubated with 20  $\mu\text{g ml}^{-1}$  of TRITC-conjugated Phalloidin (Sigma-Aldrich, Massachusetts,  
729 USA) diluted in PBS with 1% BSA in the dark at room temperature for 1 hr. After washing three times  
730 with PBS, the glass slide was air-dried and mounted in anti-fade medium (Vector laboratories,  
731 California, USA) for fluorescence microscopy (BX-60, Olympus, Tokyo, Japan).

732

### 733 **Signal colocalization evaluation**

734 The fluorescent intensity distributed in the fluorescence assays was measured by plot analysis of  
735 ImageJ (Version 1.53q, National Institutes of Health, Maryland, USA). Pearson's correlation  
736 coefficient was calculated to evaluate the signal co-localization, with a value of 1 indicating perfect  
737 colocalization, -1 indicating anti-correlation, and 0 representing no correlation.

738

### 739 **Western blotting**

740 The protein samples denatured in 1x SDS sample buffer were separated by sodium dodecyl sulfate-  
741 polyacrylamide gel electrophoresis (SDS PAGE) in a 12% gel before blotted to polyvinylidene  
742 difluoride (PVDF) membrane by the wet transblot system (Bio-Rad, California, USA). The blocked  
743 membrane was incubated with the primary antibodies: mouse anti-HA (2,000 $\times$ , Sigma-Aldrich HA-7,  
744 Massachusetts, USA), mouse anti- $\alpha$ -actin (20,000 $\times$ , Abcam Ac-40, Cambridge, UK), mouse anti-  
745 *TvCyP2* (5,000 $\times$ ) (50), mouse anti- $\alpha$ -tubulin (10,000 $\times$ , Sigma-Aldrich DM-1A, Massachusetts, USA),  
746 rabbit anti-*TvFACP $\alpha$*  (3,000 $\times$ ), mouse anti-6 $\times$ His (2,000 $\times$ , Abcam AD1.1.10, Cambridge, UK),  
747 rabbit anti-phospho-CKII substrate [(pS/pT)DXE] (1,000 $\times$ , Cell Signaling Technology, Massachusetts,  
748 USA), rabbit anti-PFO (5,000 $\times$ ) (10), mouse anti-AP65 (10,000 $\times$ ) (7), mouse anti-GAPDH (10,000 $\times$ )  
749 (51) and mouse anti- $\alpha$ -actinin (5,000 $\times$ ) (51) at 4 $^{\circ}\text{C}$  overnight, followed by HRP-conjugated anti-  
750 mouse or rabbit IgG secondary antibodies (5,000 $\times$ , Jackson ImmunoResearch, Pennsylvania, USA)  
751 at 37 $^{\circ}\text{C}$  for 1 hr. The membrane reacted with the enhanced chemiluminescence substrate (ECL, Thermo  
752 Fisher Scientific, Massachusetts, USA) were detected and quantified by UVP image system  
753 (ChemiDoc-It 815 Imager, VisionWorksLS 8.6 software, Analytik Jena Company, Jena, Germany).

754

### 755 **Immunoprecipitation**

756 Briefly,  $6 \times 10^7$  trophozoites were lysed in 1ml of lysis buffer (1% Triton X-100, 1× Protease  
757 inhibitor cocktail, 1×Phosphatase inhibitor cocktail, 100  $\mu\text{g ml}^{-1}$  TLCK, 5 mM EDTA, in TBS) and  
758 centrifuged to remove unbroken cell debris, before the addition of 20  $\mu\text{l}$  of anti-HA antibody-  
759 conjugated agarose beads (Sigma-Aldrich, Massachusetts, USA), then incubated on a rotator at 4°C  
760 overnight. The beads were recovered by centrifugation and washed three times with 1ml lysis buffer.  
761 The precipitates were denatured in 1× SDS sample buffer for western blotting or staining (48, 50).

762

### 763 **Label-free quantitative proteomic analysis**

764 The proteins separated by SDS-PAGE were fixed in methanol for SYPRO Ruby staining (Thermo  
765 Fisher Scientific, Massachusetts, USA) and visualization by the Typhoon9410 imaging system (GE  
766 healthcare, Illinois, USA). Each gel lane was equally cut into 4 pieces, then sliced into smaller 1-mm<sup>3</sup>  
767 cubes. The gel cubes were desalted by five washes sequentially in 1 ml of 20 mM triethylammonium  
768 bicarbonate buffer (TEABC) and 1 ml of 20 mM TEABC with 50% acetonitrile, with the vigorous  
769 vortex. The samples were sequentially reduced in 20 mM dithiothreitol (DTT) at 56°C for 1 hr,  
770 alkylated in 55 mM iodoacetamide in the dark at room temperature for 30 min and digested with trypsin  
771 (Promega, Wisconsin, USA) at 37°C overnight. The tryptic peptides were extracted by vortexing three  
772 times sequentially in 20%, 50%, and 100% acetonitrile, then dried in a vacuum concentrator (SpeedVac,  
773 Thermo Fisher Scientific, Massachusetts, USA) for LC-MS/MS analysis (48). The protein abundance  
774 from the mass spectrometry data was analyzed by a label-free quantitative method by Mascot search,  
775 which provides an automated calculation of the Exponentially Modified Protein Abundance Index  
776 (emPAI) to estimate the coverage of the identified peptides and abundance for each protein in a dataset.  
777 The identified proteins with an emPAI above 0.25 or specific in the co-pull-down sample with their  
778 function category are summarized in Table 1. The mass spectrometry proteomics raw data have been  
779 deposited to Dryad ([https://datadryad.org/stash/share/e30mZQEIM-nBNmJOniuiGSBJWBkB7V4-](https://datadryad.org/stash/share/e30mZQEIM-nBNmJOniuiGSBJWBkB7V4-t0XzQ891cX8)  
780 [t0XzQ891cX8](https://datadryad.org/stash/share/e30mZQEIM-nBNmJOniuiGSBJWBkB7V4-t0XzQ891cX8)) or the ProteomeXchange Consortium via the PRIDE ([www.ebi.ac.uk/pride/](http://www.ebi.ac.uk/pride/)) (52)  
781 partner repository with a dataset identifier number of PXD034359.

782 PRIDE Reviewer access account details:

783 Username: reviewer\_pxd034359@ebi.ac.uk, Password: XpCqEnqW

784

### 785 **In silico analysis of protein sequence and function**

786 The functions of the proteins identified by mass spectrometry were categorized by Protein Analysis  
787 Through Evolutionary Relationships (PANTHER) Classification System ([www.pantherdb.org/](http://www.pantherdb.org/)). The  
788 *TvFACP $\alpha$*  protein homologue was searched in TrichDB ([trichdb.org/trichdb/app](http://trichdb.org/trichdb/app)). The multiple protein  
789 sequence alignment was analyzed by the Vector NTI AdvanceR 11.5.1 software (Thermo Fisher  
790 Scientific, Massachusetts, USA). The protein search was performed by the Basic Local Alignment  
791 Search Tool (BLAST, [blast.ncbi.nlm.nih.gov/Blast.cgi](http://blast.ncbi.nlm.nih.gov/Blast.cgi)) or UniProt ([www.uniprot.org/](http://www.uniprot.org/)).

792

### 793 **Production of recombinant protein**

794 The recombinant protein was produced as previously described (48, 50). The majority of GST-

795 *Tvactin* was expressed in the inclusion bodies of *E. coli* (BL21). For the GST-pull-down assay, the  
796 inclusion bodies from 200 ml of *E. coli* culture were dissolved in 1 ml of 8 M urea at 4°C for 20 min  
797 to solubilize the proteins. Then, 1 ml of lysate was immediately added to 14 ml PBS and incubated at  
798 4°C for 30 min to refold proteins. After the removal of the insoluble pellets by low-speed centrifugation  
799 at 23,000× *g*, soluble GST-*Tvactin* was incubated with glutathione-conjugated sepharose beads as  
800 suggested by the supplier (GE healthcare, Illinois, USA) at 4°C for 3 hr and then eluted in GST elution  
801 buffer (50 mM Tris-HCl, 10 mM reduced glutathione, pH 8.0). For the solid-phase binding and *in vitro*  
802 actin polymerization assays, the bacterial inclusion bodies were solubilized in 8 M urea and directly  
803 reconstituted in 14 ml of G-buffer (0.2 mM CaCl<sub>2</sub>, 0.2 mM ATP, 0.5 mM DTT, 5 mM Tris-HCl pH  
804 8.0) at 4°C overnight. The insoluble materials were removed by ultracentrifugation at 100,000× *g* to  
805 recover the soluble G-actin in the supernatant (53). Soluble G-actin was further purified by glutathione-  
806 conjugated sepharose beads and eluted in G-buffer with 10 mM reduced glutathione.

807

### 808 **GST pull-down assay**

809 GST pull down assay was performed as previously described (50). Briefly, 80 picomoles of GST  
810 or GST-*Tvactin* immobilized on 20 µl of glutathione conjugated-sepharose beads 4B (GE healthcare,  
811 Illinois, USA) was incubated with 80 picomoles of His-*TvFACPα* or derived mutants in 1 ml GST  
812 binding buffer (PBS contains 0.2% Triton X-100 and 1 mM EDTA) at 4°C rotation overnight The GST  
813 beads were washed three times by 1 ml of GST binding buffer then denatured in 1× SDS sample buffer  
814 for further analysis.

815

### 816 ***TvFACPα* antiserum production**

817 The recombinant His-*TvFACPα* full-length protein was produced and purified by a standard  
818 protocol as suggested by the supplier (QIAGEN, Hilden, Germany) (48, 50). Using the purified His-  
819 *TvFACPα* protein to immunize rabbits for antiserum production is a customized service provided by  
820 the manufacturer (Genetex, California, USA). The antibody specificity of anti-*TvFACPα* was tested by  
821 western blotting as shown in Figure 6A.

822

### 823 ***In vitro* actin polymerization and co-sedimentation assay**

824 Insoluble GST-*Tvactin* denatured in 0.5 ml of 8M urea was reconstituted in 7.5 ml of G-buffer (0.2  
825 mM CaCl<sub>2</sub>, 0.2 mM ATP, 0.5 mM DTT, 5 mM Tris-HCl, pH 8.0) at 4°C overnight to ensure that the  
826 thorough GST-*Tvactin* depolymerizes into the G-actin form. Then, 80 picomoles of G-actin in 1 ml of  
827 G-buffer were added 1/10 volume of 10× F-buffer (500 mM KCl, 20 mM MgCl<sub>2</sub>, and 10 mM ATP,  
828 100 mM Tris, pH 7.5) at 4°C for 1 hr to trigger actin polymerization. F-actin was recovered from the  
829 pellet by 100,000× *g* ultracentrifugation, whereas soluble G-actin in the supernatant (54). The ratio of  
830 F-actin versus G-actin was evaluated with Coomassie blue staining or Western Blot detection.  
831 Alternatively, F-actin and co-sediments were recovered from the pellet by 100,000× *g*  
832 ultracentrifugation of the *in vitro* actin polymerization assay in the presence of 80 picomoles of His-  
833 *TvFACPα* wild type or His-Δ237 at 4°C for 1 hr.



834

### 835 **ELISA-based solid-phase binding assay**

836 The solid-phase binding assay was performed as described previously, with a few modifications  
837 (54). Briefly, 100  $\mu$ l of 2.5  $\mu$ M G-actin in G-buffer or F-actin in F-buffer was added to a 96-well  
838 microplate and incubated at 4°C with gentle shaking for 8 hr. After three washes with PBST (0.05%  
839 Tween 20 in PBS), the samples were blocked in PBST with 5% non-fat milk at 37°C for 2 hr before  
840 100  $\mu$ l aliquots of different concentrations of His-*Tv*FACP $\alpha$  (0, 2.5, 5, 10, 20, 40, and 80  $\mu$ M) were  
841 added to the wells and incubated at 4°C with gentle agitation overnight for protein-protein interaction.  
842 Unbound protein was removed by three washes with PBST and the plate was incubated with mouse  
843 anti-6 $\times$ His primary antibody (10,000 $\times$ , in PBST containing 5% non-fat milk) at room temperature for  
844 2 hr, followed by three washes with PBST. The wells were incubated with HRP-conjugated goat anti-  
845 mouse IgG secondary antibody (5000 $\times$  in PBST containing 5% non-fat milk, Jackson  
846 ImmunoResearch, Pennsylvania, USA) at room temperature for 2 hr. The wells were washed before  
847 the addition of 100  $\mu$ l/well of 3, 3', 5, 5'-tetramethylbenzidine (TMB, Sigma-Aldrich, Massachusetts,  
848 USA) substrate at room temperature for 5 min. The colorimetric reaction was stopped by the addition  
849 of 100  $\mu$ l/well 1N HCl and the absorbance was detected by spectrophotometry at OD<sub>450</sub> (Molecular  
850 Device, California, USA). The absorbances at OD<sub>450</sub> were plotted against the concentrations of His-  
851 *Tv*FACP $\alpha$  to generate Scatchard plots and calculate  $K_d$  and  $B_{max}$  values (54).

852

### 853 **Actin biochemical fractionation**

854 G- and F-actin were fractionated and enriched using a commercial *in vivo* assay biochem kit  
855 (Cytoskeleton Inc, Colorado, USA), according to the manufacturer's instructions with minor  
856 modifications. Briefly, around  $3 \times 10^7$  trophozoites were incubated in cell lysis buffer (Cytoskeleton  
857 Inc, Colorado, USA) with vigorous agitation at 4°C for 30 min and homogenized by a 23-gauge needle  
858 on a 5-ml syringe. The total lysate was centrifuged at 1,000 $\times$  g to remove the unbroken cell debris,  
859 followed by ultracentrifugation at 100,000 $\times$  g for 1 hr to separate the insoluble F-actin and associated  
860 proteins in the pellet from soluble G-actin in the supernatant. In western blotting,  $\alpha$ -tubulin and *Tv*CyP2  
861 were respectively detected as purity markers for F-actin and G-actin fractions.

862

### 863 **Cell migration assay**

864 For the wound healing assay, adherent *T. vaginalis* trophozoites were cultured to a confluent  
865 monolayer in a T25 flask. A scratch (200- $\mu$ m to 1-mm wide) was generated by scraping the trophozoite  
866 monolayer with a P200 tip. After removal of cell debris by washing once with the growth medium, the  
867 culture flask was incubated at 37°C and images were captured in a defined area at an interval of 30 min  
868 over 2 hr. The wound closure area in each image was measured by ImageJ software (Version 1.53q,  
869 National Institutes of Health, Maryland, USA). For the trans-well migration assay,  $\sim 1 \times 10^7$   
870 trophozoites suspended in 2 ml of TYI medium were inoculated into the top insert divided by a  
871 polyester membrane with 3- $\mu$ m pores (4.6 cm<sup>2</sup>, JET Biofil, Guangzhou, China). The top insert was  
872 placed in a 6-well culture plate containing 2 ml of TYI medium and cultured at 37 °C for 30 min. The

873 trophozoites in the top insert and bottom well were collected for microscopic observation and western  
874 blotting.

875

### 876 **Statistical analysis**

877 Statistical significance of data collected from control and conditional samples was analyzed by  
878 Microsoft Office Excel 2019 software with Student's t-test.  $P < 0.05$  is considered as significant  
879 difference.

880

### 881 **Acknowledgement**

882 We are grateful to Dr. Jung-Hsiang Tai (Institute of Biomedical Sciences, Academia Sinica, Taiwan)  
883 for *T. vaginalis* T1 isolate, Dr. John Alderete (Washington State University, USA) for the anti- $\alpha$ -actinin,  
884 anti-GAPDH, and anti-AP65 antibodies, and Dr. Rossana Arroyo (CINVESTA, Mexico City, Mexico)  
885 for the anti-PFO antibody. Also, we are grateful to the Proteomics Core Facility (Institute of Biomedical  
886 Sciences, Academia Sinica, Taiwan) for the LC-MS/MS analysis. This work was supported by grants  
887 from the Ministry of Science and Technology of Taiwan (110-2320-B-002-048- and 110-2320-B-002-  
888 076-).

889

### 890 **Author contributions**

891 Kai-Hsuan Wang: Investigation, Validation, and Methodology.

892 Jing-Yang Chang: Investigation, Validation, and Methodology.

893 Fu-An Li: Investigation, Validation, and Methodology.

894 Yen-Ju Chen: Investigation, Validation, and Methodology.

895 Kuan-Yi Wu: Investigation, Validation, and Methodology.

896 Tse-Ling Chu: Investigation and Validation

897 Jessica Lin: Investigation and Validation

898 Hong-Ming Hsu: Investigation, Validation, Project Administration, Supervision, Funding Acquisition,  
899 Conceptualization, Writing-Original Draft Preparation, and Writing-Review & Editing.

900

### 901 **Statement of conflict of interest**

902 The authors declare that they have no competing interests in this manuscript.

903

### 904 **Data availability Section**

905 All data generated or analyzed during this study are included in the manuscript and supplementary data;  
906 Source Data files have been provided for Table 1, the statistical analysis of quantification, and raw gel  
907 or blot images generated in this study. The proteomics raw data have been deposited to Dryad  
908 (<https://datadryad.org/stash/share/e30mZQEIM-nBNmJOniuiGSBJWBkB7V4-t0XzQ891cX8>) and  
909 PRIDE ([www.ebi.ac.uk/pride/](http://www.ebi.ac.uk/pride/)) with a dataset identifier number PXD034359. (PRIDE Reviewer access  
910 account details: Username: reviewer\_pxd034359@ebi.ac.uk, Password: XpCqEnqW).

911

## 912 **References**

- 913 1. World Health Organization (2008) Global incidence and prevalence of selected curable sexually  
914 transmitted infections. ISBN 978 92 4 150383 9
- 915 2. Chen YP, Riestra AM, Rai AK, Johnson PJ (2019) A Novel Cadherin-like Protein Mediates  
916 Adherence to and Killing of Host Cells by the Parasite *Trichomonas vaginalis*. *mBio*  
917 10(3):e00720-19
- 918 3. Riestra AM., Gandhi S, Sweredoski MJ, Moradian A, Hess S, Urban S, Johnson P J (2015) A  
919 *Trichomonas vaginalis* Rhomboid Protease and Its Substrate Modulate Parasite Attachment and  
920 Cytolysis of Host Cells. *PLoS pathogens* 11(12): e1005294
- 921 4. Rendón-Gandarilla FJ, Ramón-Luing Lde L, Ortega-López J, Rosa de Andrade I, Benchimol M,  
922 Arroyo R. (2013) The TvLEGU-1, a legumain-like cysteine proteinase, plays a key role in  
923 *Trichomonas vaginalis* cytoadherence. *Biomed Res Int* :561979. doi:10.1155/2013/561979
- 924 5. Pachano T, Nievas YR, Lizarraga A, Johnson PJ, Strobl-Mazzulla PH, de Miguel N (2017)  
925 Epigenetics regulates transcription and pathogenesis in the parasite *Trichomonas vaginalis*. *Cell*  
926 *Microbiol* 19(6):10.1111/cmi.12716. doi:10.1111/cmi.12716
- 927 6. Molgora BM, Rai AK, Sweredoski MJ, Moradian A, Hess S, Johnson PJ (2021) A Novel  
928 *Trichomonas vaginalis* Surface Protein Modulates Parasite Attachment via Protein:Host Cell  
929 Proteoglycan Interaction. *mBio* 12(1):e03374-20
- 930 7. Alderete JF, Nguyen J, Mundodi V, Lehker MW (2003) Heme-iron increases levels of AP65-  
931 mediated adherence by *Trichomonas vaginalis*. *Microb Pathog* 36(5):263-271.  
932 doi:10.1016/j.micpath..12.007
- 933 8. Alderete JF, O'Brien JL, Arroyo R, Engbring JA, Musatovova O, Lopez O, Lauriano C, Nguyen J  
934 (1995) Cloning and molecular characterization of two genes encoding adhesion proteins involved  
935 in *Trichomonas vaginalis* cytoadherence. *Mol Microbiol* 17(1):69-83. doi: 10.1111/j.1365-  
936 2958.1995.mmi\_17010069.x.
- 937 9. O'Brien JL, Lauriano CM, Alderete JF (1996) Molecular characterization of a third malic enzyme-  
938 like AP65 adhesin gene of *Trichomonas vaginalis*. *Microb Pathog* 20(6):335-49. doi:  
939 10.1006/mpat.1996.0032.
- 940 10. Moreno-Brito V, Yáñez-Gómez C, Meza-Cervantez P, Avila-González L, Rodríguez MA, Ortega-  
941 López J, González-Robles A, Arroyo R (2005) A *Trichomonas vaginalis* 120 kDa protein with  
942 identity to hydrogenosome pyruvate:ferredoxin oxidoreductase is a surface adhesin induced by iron.  
943 *Cell Microbiol* 7(2):245-58. doi: 10.1111/j.1462-5822.2004.00455.x.
- 944 11. Wu C (2007) Focal adhesion: a focal point in current cell biology and molecular medicine. *Cell*  
945 *Adh Migr* 1(1):13-18. doi:10.4161/cam.1.1.4081.
- 946 12. Fournier MF, Sauser R, Ambrosi D, Meister JJ, Verkhovsky AB (2010) Force transmission in  
947 migrating cells. *J Cell Biol* 188(2):287-297. doi:10.1083/jcb.200906139.
- 948 13. Bachir AI, Horwitz AR, Nelson WJ, Bianchini JM (2017) Actin-Based Adhesion Modules Mediate  
949 Cell Interactions with the Extracellular Matrix and Neighboring Cells. *Cold Spring Harb Perspect*  
950 *Biol* 9(7):a023234.

- 951 14. Casta e Silva Filho F, de Souza W, Lopes JD (1988) Presence of laminin-binding proteins in  
952 trichomonads and their role in adhesion. *Proc Natl Acad Sci U S A* 85(21):8042-8046.  
953 doi:10.1073/pnas.85.21.8042
- 954 15. Huang KY, Huang PJ, Ku FM, Lin R, Alderete JF, Tang P (2012) Comparative transcriptomic and  
955 proteomic analyses of *Trichomonas vaginalis* following adherence to fibronectin. *Infect Immun*  
956 80(11):3900-3911. doi:10.1128/IAI.00611-12
- 957 16. Lama A, Kucknoor A, Mundodi V, Alderete JF (2009) Glyceraldehyde-3-phosphate dehydrogenase  
958 is a surface-associated, fibronectin-binding protein of *Trichomonas vaginalis*. *Infect Immun*  
959 77(7):2703-2711. doi:10.1128/IAI.00157-09
- 960 17. Dos Santos O, Rigo GV, Macedo AJ, Tasca T (2017) *Trichomonas vaginalis* clinical isolates:  
961 cytoadherence and adherence to polystyrene, intrauterine device, and vaginal ring. *Parasitol Res*  
962 116(12):3275-3284. doi:10.1007/s00436-017-5638-0
- 963 18. Arroyo R, González-Robles A, Martínez-Palomo A, Alderete JF (1993) Signalling of *Trichomonas*  
964 *vaginalis* for amoeboid transformation and adhesion synthesis follows cytoadherence. *Mol*  
965 *Microbiol* 7(2):299-309. doi:10.1111/j.1365-2958.1993.tb01121.x
- 966 19. Velle KB, Fritz-Laylin LK (2020) Conserved actin machinery drives microtubule-independent  
967 motility and phagocytosis in *Naegleria*. *J Cell Biol* 219(11):e202007158.  
968 doi:10.1083/jcb.202007158
- 969 20. Sohn HJ, Song KJ, Kang H, Ham AJ, Lee JH, Chwae YJ, Kim K, Park S, Kim JH, Shin HJ (2019)  
970 Cellular characterization of actin gene concerned with contact-dependent mechanisms in *Naegleria*  
971 *fowleri*. *Parasite Immunol* 41(8):e12631. doi: 10.1111/pim.12631
- 972 21. Pollard TD, Cooper JA (2009) Actin, a central player in cell shape and movement. *Science*  
973 326(5957):1208-1212. doi:10.1126/science.1175862
- 974 22. Friedl P, Bröcker EB (2000) The biology of cell locomotion within three-dimensional extracellular  
975 matrix. *Cell Mol Life Sci* 57(1):41-64. doi:10.1007/s000180050498
- 976 23. Parsons JT, Horwitz AR, Schwartz MA (2010) Cell adhesion: integrating cytoskeletal dynamics  
977 and cellular tension. *Nat Rev Mol Cell Biol* 11(9):633-643. doi:10.1038/nrm2957
- 978 24. Mullins RD, Heuser JA, Pollard TD (1998) The interaction of Arp2/3 complex with actin:  
979 nucleation, high affinity pointed end capping, and formation of branching networks of filaments.  
980 *Proc Natl Acad Sci U S A* 95(11):6181-6186. doi:10.1073/pnas.95.11.6181.
- 981 25. Tang DD, Gerlach BD (2017) The roles and regulation of the actin cytoskeleton, intermediate  
982 filaments and microtubules in smooth muscle cell migration. *Respir Res.* 2017;18(1):54.  
983 doi:10.1186/s12931-017-0544-7
- 984 26. Bearer EL (1993) Role of actin polymerization in cell locomotion: molecules and models. *Am J*  
985 *Respir Cell Mol Biol* 8(6):582-591. doi:10.1165/ajrcmb/8.6.582
- 986 27. Funk J, Merino F, Schaks M, Rottner K, Raunser S, Bieling P (2021) A barbed end interference  
987 mechanism reveals how capping protein promotes nucleation in branched actin networks. *Nat*  
988 *Commun* 12(1):5329. doi:10.1038/s41467-021-25682-5
- 989 28. Wear MA, Yamashita A, Kim K, Maéda Y, Cooper JA (2003) How capping protein binds the barbed

- 990 end of the actin filament. *Curr Biol* 13(17):1531-1537. doi:10.1016/s0960-9822(03)00559-1
- 991 29. Kim K, Yamashita A, Wear MA, Maéda Y, Cooper JA (2004) Capping protein binding to actin in  
992 yeast: biochemical mechanism and physiological relevance. *J Cell Biol* 164(4):567-580.  
993 doi:10.1083/jcb.200308061
- 994 30. Hernandez-Valladares M, Kim T, Kannan B, Tung A, Aguda AH, Larsson M, Cooper JA, Robinson  
995 RC (2010) Structural characterization of a capping protein interaction motif defines a family of  
996 actin filament regulators. *Nat Struct Mol Biol* 17(4):497-503. doi: 10.1038/nsmb.1792
- 997 31. Edwards M, Zwolak A, Schafer DA, Sept D, Dominguez R, Cooper JA (2014) Capping protein  
998 regulators fine-tune actin assembly dynamics. *Nat Rev Mol Cell Biol* 15(10):677-689.  
999 doi:10.1038/nrm3869
- 1000 32. Solís C, Russell B (2021) Striated muscle proteins are regulated both by mechanical deformation  
1001 and by chemical post-translational modification. *Biophys Rev* 13(5):679-695. doi:10.1007/s12551-  
1002 021-00835-4
- 1003 33. Canton DA, Olsten ME, Kim K, Doherty-Kirby A, Lajoie G, Cooper JA, Litchfield DW (2005)  
1004 The pleckstrin homology domain-containing protein CKIP-1 is involved in regulation of cell  
1005 morphology and the actin cytoskeleton and interaction with actin capping protein. *Mol Cell Biol*  
1006 25(9):3519-34. doi: 10.1128/MCB.25.9.3519-3534.2005
- 1007 34. Canton DA, Olsten ME, Niederstrasser H, Cooper JA, Litchfield DW (2006) The role of CKIP-1  
1008 in cell morphology depends on its interaction with actin-capping protein. *J Biol Chem*  
1009 281(47):36347-59. doi: 10.1074/jbc.M607595200.
- 1010 35. Kusdian G, Woehle C, Martin WF, Gould SB (2013) The actin-based machinery of *Trichomonas*  
1011 *vaginalis* mediates flagellate-amoeboid transition and migration across host tissue. *Cell Microbiol*  
1012 15(10):1707-1721. doi:10.1111/cmi.12144
- 1013 36. Vandekerckhove J, Deboen A, Nassal M, Wieland T (1985) The phalloidin binding site of F-actin.  
1014 *EMBO J* 4(11):2815-2818. PMID: 4065095; PMCID: PMC554583.
- 1015 37. Weichhart T, Haidinger M, Hörl WH, Säemann MD (2008) Current concepts of molecular defence  
1016 mechanisms operative during urinary tract infection. *Eur J Clin Invest* 38 Suppl 2:29-38.  
1017 doi:10.1111/j.1365-2362.2008.02006.x
- 1018 38. Carlton JM, Hirt RP, Silva JC, Delcher AL, Schatz M, Zhao Q, Wortman JR, Bidwell SL,  
1019 Alsmark UC, Besteiro S, Sicheritz-Ponten T *et al* (2007) Draft genome sequence of the sexually  
1020 transmitted pathogen *Trichomonas vaginalis*. *Science* 315(5809):207-212.  
1021 doi:10.1126/science.1132894
- 1022 39. Davidson PM, Cadot B (2021) Actin on and around the Nucleus. *Trends Cell Biol* 31(3):211-223.  
1023 doi:10.1016/j.tcb.2020.11.009
- 1024 40. Falck S, Paavilainen VO, Wear MA, Grossmann JG, Cooper JA, Lappalainen P. (2004) Biological  
1025 role and structural mechanism of twinfilin-capping protein interaction. *EMBO J* 23(15):3010-3019.  
1026 doi:10.1038/sj.emboj.7600310
- 1027 41. Yuan A, Mills RG, Bamberg JR, Bray JJ (1999) Cotransport of glyceraldehyde-3-phosphate  
1028 dehydrogenase and actin in axons of chicken motoneurons. *Cell Mol Neurobiol* 19(6):733-744.

- 1029 doi:10.1023/a:1006953022763
- 1030 42. Choder M (2004) Rpb4 and Rpb7: subunits of RNA polymerase II and beyond. *Trends Biochem*  
1031 *Sci* 29(12):674-681. doi:10.1016/j.tibs.2004.10.007
- 1032 43. Mitsuzawa H, Kimura M, Kanda E, Ishihama A (2005) Glyceraldehyde-3-phosphate  
1033 dehydrogenase and actin associate with RNA polymerase II and interact with its Rpb7  
1034 subunit. *FEBS Lett* 579(1):48-52. doi:10.1016/j.febslet.2004.11.045
- 1035 44. Battistutta R, De Moliner E, Sarno S, Zanotti G, Pinna LA (2001) Structural features underlying  
1036 selective inhibition of protein kinase CK2 by ATP site-directed tetrabromo-2-benzotriazole. *Protein*  
1037 *Sci* 10(11):2200-2206. doi:10.1110/ps.19601
- 1038 45. Cable BL, John DT (1986) Conditions for maximum enflagellation in *Naegleria fowleri*. *J*  
1039 *Protozool* 33(4):467-72. doi: 10.1111/j.1550-7408.1986.tb05643.x
- 1040 46. Yuyama S (1971) The effects of selected chemical agents on the amoeba-flagellate transformation  
1041 in *Naegleria gruberi*. *J Protozool* 18(2):337-343. doi:10.1111/j.1550-7408.1971.tb03328.x
- 1042 47. Willmer EN. (1961) Amoeba-flagellate transformation. *Exp Cell Res Suppl* 8:32-46.  
1043 doi:10.1016/0014-4827(61)90338
- 1044 48. Hsu HM, Lee Y, Hsu PH, Liu HW, Chu CH, Chou YW, Chen YR, Chen SH, Tai JH (2014) Signal  
1045 transduction triggered by iron to induce the nuclear importation of a Myb3 transcription factor in  
1046 the parasitic protozoan *Trichomonas vaginalis*. *J Biol Chem* 289(42):29334-29349.  
1047 doi:10.1074/jbc.M114.599498
- 1048 49. Fuhrmann A, Engler AJ (2015) The cytoskeleton regulates cell attachment strength. *Biophys J*  
1049 109(1):57-65. doi:10.1016/j.bpj.2015.06.003
- 1050 50. Hsu HM, Huang YH, Aryal S, Liu HW, Chen C, Chen SH, Chu CH, Tai JH (2020) Endomembrane  
1051 Protein Trafficking Regulated by a TvCyP2 Cyclophilin in the Protozoan Parasite, *Trichomonas*  
1052 *vaginalis*. *Sci Rep* 10(1):1275. doi:10.1038/s41598-020-58270-6
- 1053 51. Neace CJ, Alderete JF (2013) Epitopes of the highly immunogenic *Trichomonas vaginalis*  $\alpha$ -actinin  
1054 are serodiagnostic targets for both women and men. *J Clin Microbiol* 51(8):2483-2490.  
1055 doi:10.1128/JCM.00582-13
- 1056 52. Perez-Riverol, Y, Bai, J, Bandla, C, García-Seisdedos, D, Hewapathirana, S, Kamatchinathan, S,  
1057 Kundu, DJ, Prakash, A, Frericks-Zipper, A, Eisenacher, M, Walzer, M, Wang, S, Brazma, A,  
1058 Vizcaíno, JA (2022) The PRIDE database resources in 2022: a hub for mass spectrometry-based  
1059 proteomics evidences. *Nucleic acids research*, 50(D1), D543–D552. doi: 10.1093/nar/gkab1038..
- 1060 53. Hatano T, Alioto S, Roscioli E, Palani S, Clarke ST, Kamnev A, Hernandez-Fernaund JR,  
1061 Sivashanmugam L, Chapa-Y-Lazo B, Jones AME *et al* (2018) Rapid production of pure  
1062 recombinant actin isoforms in *Pichia pastoris*. *J Cell Sci* 131(8):jcs213827.  
1063 doi:10.1242/jcs.213827
- 1064 54. He HJ, Wang XS, Pan R, Wang DL, Liu MN, He RQ (2009) The proline-rich domain of tau plays  
1065 a role in interactions with actin. *BMC Cell Biol* 10:81. doi:10.1186/1471-2121-10-81
- 1066
- 1067

1068 **Table 1. The list of *Tvactin*-interacted proteins identified by LC-MS/MS**  
 1069 The proteins identified by mass spectrometry with emPAI value above 0.25 or the peptides specific in  
 1070 the immunoprecipitant of HA-*Tvactin* were listed.

| Accession                                      | Score | Mass   | emPAI | Description                                                                  |
|------------------------------------------------|-------|--------|-------|------------------------------------------------------------------------------|
| <b>Chaperone</b>                               |       |        |       |                                                                              |
| A2DS85                                         | 56    | 58182  | 0.15  | T-complex protein 1 subunit delta, TVAG_066690                               |
| A2E9D9                                         | 62    | 58553  | 0.15  | Chaperonin subunit alpha1 CCTalpha, putative, TVAG_364270                    |
| <b>DNA/RNA-binding, or -regulatory protein</b> |       |        |       |                                                                              |
| A2DHC5                                         | 37    | 15204  | 0.31  | Histone H2A OS=Trichomonas vaginalis, TVAG_021440                            |
| A2ELI6                                         | 46    | 11528  | 0.42  | HTH myb-type domain-containing protein, TVAG_257520                          |
| A2D755                                         | 78    | 127201 | 0.1   | DEAD/DEAH box helicase family protein, TVAG_119080                           |
| <b>Cytoskeletal protein</b>                    |       |        |       |                                                                              |
| A2FE30                                         | 541   | 29551  | 9.69  | F-actin-capping protein subunit alpha, TVAG_470230                           |
| A2E0V9                                         | 104   | 46956  | 0.3   | Actin-like protein 3, putative, TVAG_371880                                  |
| A2E755                                         | 69    | 533676 | 0.02  | Dynein heavy chain family protein, TVAG_006480                               |
| A2EIJ3                                         | 43    | 48424  | 0.19  | Coronin, TVAG_124870                                                         |
| A2DC16                                         | 208   | 50493  | 0.51  | Tubulin beta chain, TVAG_008680                                              |
| A2EGW8                                         | 73    | 515283 | 0.02  | Dynein heavy chain family protein, TVAG_497260                               |
| A2GKR2                                         | 363   | 26669  | 5.37  | Actin (Fragment), TVAG_534990                                                |
| P90623                                         | 659   | 42154  | 9.49  | Actin, TVAG_337240                                                           |
| A2DKH3                                         | 163   | 106648 | 0.21  | Alpha-actinin, putative, TVAG_190450                                         |
| <b>Membrane traffic protein</b>                |       |        |       |                                                                              |
| A2EV08                                         | 90    | 85200  | 0.1   | Clathrin and VPS domain-containing protein, TVAG_369030                      |
| <b>Metabolite interconversion enzyme</b>       |       |        |       |                                                                              |
| A2DSX4                                         | 80    | 107447 | 0.21  | Alpha-1,4 glucan phosphorylase, TVAG_348330                                  |
| A2EBX0                                         | 218   | 44060  | 0.76  | Succinate--CoA ligase [ADP-forming] subunit beta, mitochondrial, TVAG_259190 |
| A2FR66                                         | 116   | 35697  | 0.26  | 6-phosphofructokinase, TVAG_496160                                           |
| A2E9H3                                         | 37    | 47022  | 0.19  | Pyrophosphate--fructose 6-phosphate 1-phosphotransferase 2, TVAG_364620      |
| A2FVK7                                         | 224   | 44039  | 1.12  | Succinate--CoA ligase [ADP-forming] subunit beta, mitochondrial, TVAG_144730 |
| A2DM03                                         | 169   | 34697  | 0.61  | 6-phosphofructokinase, TVAG_462920                                           |
| A2FKA7                                         | 82    | 34780  | 0.27  | 6-phosphofructokinase, TVAG_293770                                           |
| A2EM29                                         | 503   | 39758  | 6.2   | Glyceraldehyde-3-phosphate dehydrogenase, TVAG_475220                        |
| Q27088                                         | 86    | 129430 | 0.1   | Pyruvate:ferredoxin oxidoreductase A, TVAG_198110                            |
| A2EAJ8                                         | 98    | 42785  | 0.47  | Malic enzyme, TVAG_491670                                                    |
| A2DM76                                         | 95    | 38889  | 0.11  | Thymidine kinase, TVAG_083490                                                |
| A2D987                                         | 238   | 44049  | 1.33  | Succinate--CoA ligase [ADP-forming] subunit beta, mitochondrial, TVAG_183500 |
| A2DFT9                                         | 198   | 35079  | 1.02  | 6-phosphofructokinase, TVAG_391760                                           |
| A2F259                                         | 111   | 109764 | 0.16  | Amylomaltase, TVAG_154680                                                    |
| A2D7H3                                         | 94    | 110021 | 0.08  | Amylomaltase, TVAG_120280                                                    |

#### Protein modifying enzyme

|        |    |       |      |                                                         |
|--------|----|-------|------|---------------------------------------------------------|
| A2EPF2 | 49 | 95046 | 0.09 | Proteasome/cyclosome repeat family protein, TVAG_286380 |
|--------|----|-------|------|---------------------------------------------------------|

#### Protein-binding activity modulator

|        |    |       |      |                                                |
|--------|----|-------|------|------------------------------------------------|
| A2EB65 | 53 | 40705 | 0.22 | G-protein alpha subunit, putative, TVAG_274750 |
|--------|----|-------|------|------------------------------------------------|

|        |    |       |      |                                            |
|--------|----|-------|------|--------------------------------------------|
| A2EJL0 | 36 | 24328 | 0.18 | IBD domain-containing protein, TVAG_197940 |
|--------|----|-------|------|--------------------------------------------|

#### Translation protein

|        |    |       |      |                                          |
|--------|----|-------|------|------------------------------------------|
| A2E4D0 | 39 | 40574 | 0.11 | Ribosomal protein, putative, TVAG_128790 |
|--------|----|-------|------|------------------------------------------|

|        |    |       |      |                                        |
|--------|----|-------|------|----------------------------------------|
| A2DSF6 | 55 | 48559 | 0.19 | Elongation factor 1-alpha, TVAG_067400 |
|--------|----|-------|------|----------------------------------------|

|        |     |       |      |                                                  |
|--------|-----|-------|------|--------------------------------------------------|
| A2ECS2 | 117 | 94235 | 0.36 | Tr-type G domain-containing protein, TVAG_276410 |
|--------|-----|-------|------|--------------------------------------------------|

|        |    |       |      |                                               |
|--------|----|-------|------|-----------------------------------------------|
| A2DSV0 | 99 | 28352 | 0.34 | Ribosomal protein S3Ae, putative, TVAG_348090 |
|--------|----|-------|------|-----------------------------------------------|

#### Transporter

|        |    |       |      |                                                     |
|--------|----|-------|------|-----------------------------------------------------|
| A2FS41 | 70 | 49238 | 0.18 | V-ATPase_H_C domain-containing protein, TVAG_262750 |
|--------|----|-------|------|-----------------------------------------------------|

|        |    |       |     |                                                  |
|--------|----|-------|-----|--------------------------------------------------|
| A2ED49 | 68 | 68309 | 0.2 | H(+)-transporting two-sector ATPase, TVAG_420260 |
|--------|----|-------|-----|--------------------------------------------------|

|        |    |       |      |                                             |
|--------|----|-------|------|---------------------------------------------|
| A2ES57 | 50 | 55789 | 0.41 | Vacuolar proton pump subunit B, TVAG_453110 |
|--------|----|-------|------|---------------------------------------------|

#### Uncharacterized protein

|        |    |        |      |                                      |
|--------|----|--------|------|--------------------------------------|
| A2E2D0 | 59 | 149814 | 0.06 | Uncharacterized protein, TVAG_098000 |
|--------|----|--------|------|--------------------------------------|



1072 **Supplement data and legends**

1073

1074 **Figure 2-Figure Supplement 1.**

Fig 2. S1

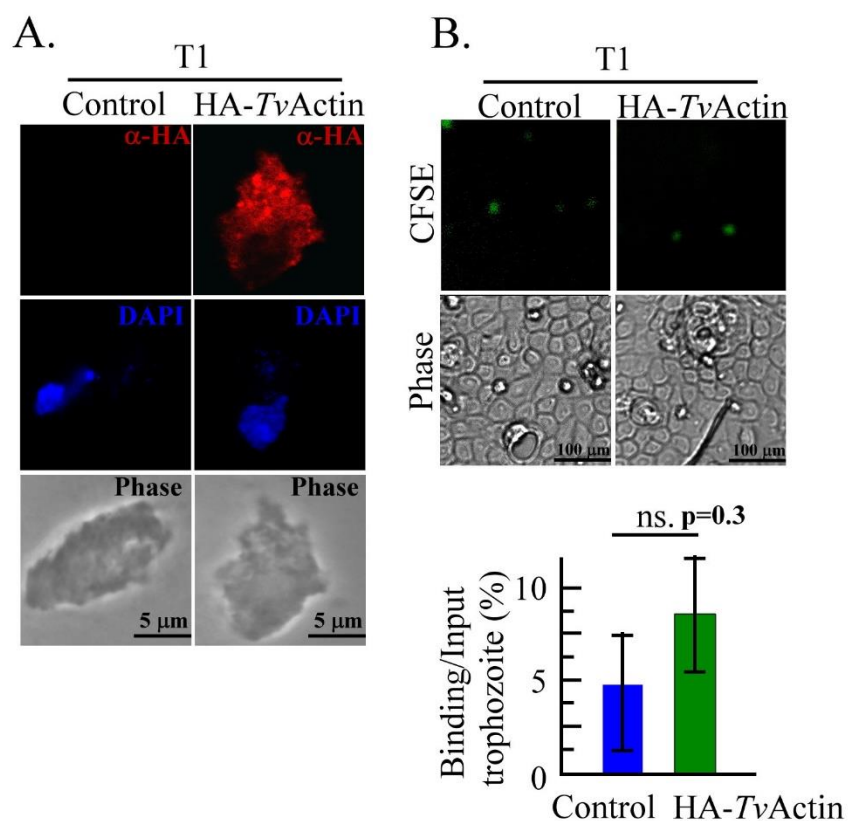

1075

1076 **Figure 2-Figure Supplement 1. Overexpression of HA-Tvactin in nonadherent T1**  
1077 **isolate.** (A.) The non-transgenic and HA-Tvactin transgenic T1 trophozoites were fixed for  
1078 IFA by an anti-HA antibody and then incubated with a Cy3-conjugated secondary antibody.  
1079 The nuclei were stained by DAPI and the morphology was observed by phase-contrast  
1080 microscopy. The scale bars represent 5  $\mu$ m. (B.) The non-transgenic and HA-Tvactin  
1081 transgenic T1 trophozoites prelabeled by CFSE were co-cultured with hVECs at MOI of 2:1  
1082 for 1 hr in the cytoadherence binding assay. The scale bars represent 100  $\mu$ m. The assays  
1083 were repeated three times. Data in the histogram are presented as mean  $\pm$  SEM. Significance  
1084 with p-value is statistically analyzed by Student's t-test as indicated. (n=3, P<0.01, P<0.05,  
1085 and ns, no significance).

1086

1087

1088

1089

1090

1091 **Figure 2-Figure Supplement 2.**

## Fig 2. S2

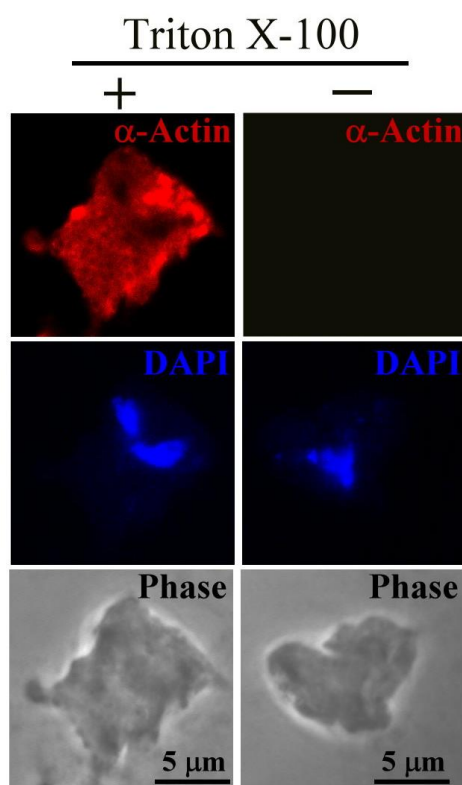

1092

1093

**Figure 2-Figure Supplement 2. No detectable  $\alpha$ -actin on the cell surface of *T. vaginalis*.**

1094

The TH17 trophozoites with or without Triton X-100 permeation were examined by IFA using

1095

an anti- $\alpha$ -actin antibody, followed by incubation with a Cy3-conjugated secondary antibody.

1096

The nuclei were stained by DAPI. The morphology was observed by phase-contrast

1097

microscopy. The scale bars represent 5  $\mu$ m.

1098

1099

1100

1101

1102

1103

1104

1105 **Figure 2-Figure Supplement 3.**

Fig 2. S3

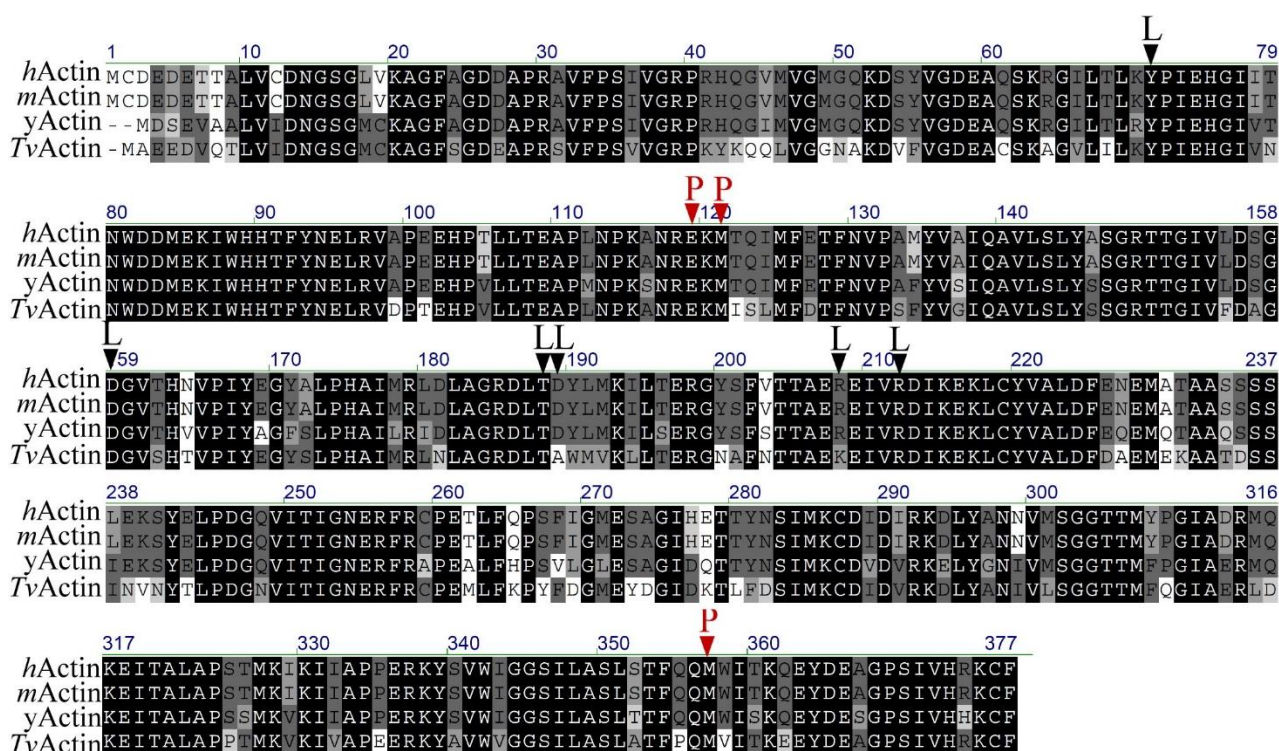

1106

1107

**Figure 2-Figure Supplement 3. Protein sequence alignment of  $\alpha$ -actin and *TvFACPa*.**

1108

(A.) The full-length protein sequences of  $\alpha$ -actin from human (*hActin*, P68133), mouse

1109

(*mActin*, P68134), yeast (*yActin*, P60010), and *T. vaginalis* (*TvActin*, TVAG\_337240) were

1110

aligned to show the protein sequence similarity. The conserved amino acid residues are

1111

highlighted, and the binding sites of phalloidin or LatB in  $\alpha$ -actin are indicated by P or L as

1112

shown at the top of sequences, respectively.

1113

1114 **Figure 4-Figure Supplement 1.**

Fig 4. S1

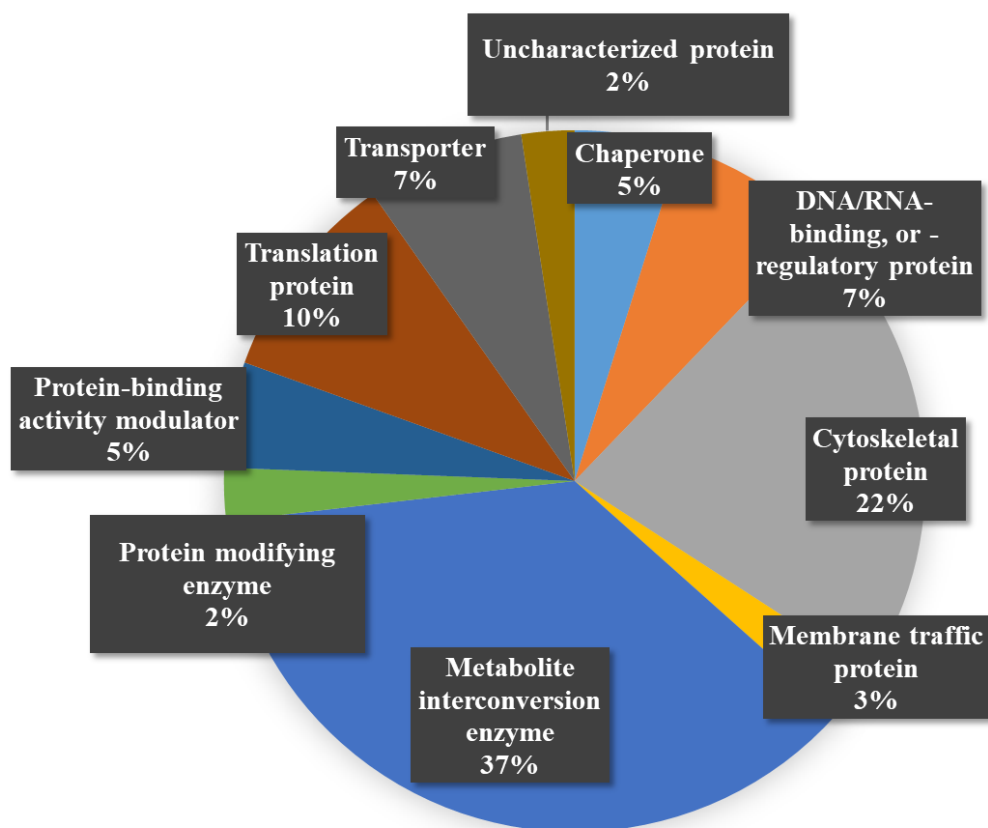

1115

1116

**Figure 4-Figure Supplement 1. Protein function category.** The mass identified proteins were classified by function into multiple cellular pathways, including cytoskeleton proteins (22%), chaperones (5%), membrane trafficking (3%), transporter (7%), protein binding (5%), modification (2%), DNA/RNA regulation (7%) and translation (10%), metabolism enzymes (37%), and uncharacterized proteins (2%).

1121

1122

1123 **Figure 4-Figure Supplement 2.**

Fig 4. S2

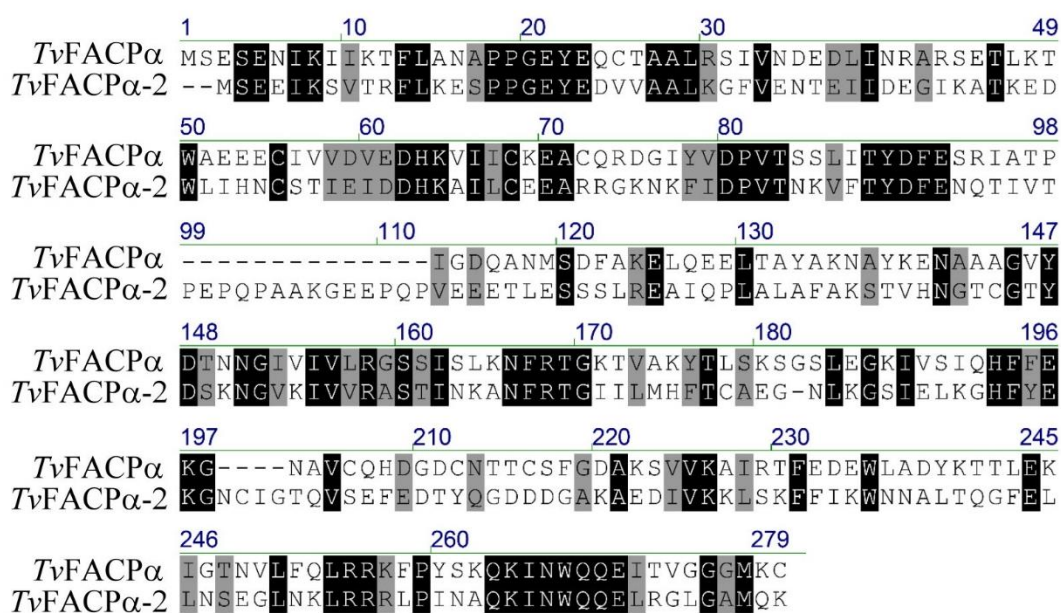

1124

1125 **Figure 4-Figure Supplement 2.** The sequence alignment for *TvFACPs* in *T. vaginalis*. The  
 1126 protein sequences of *TvFACPα* (TVAG\_470230) and *TvFACPα-2* (TVAG\_212270) were aligned.  
 1127 The conserved amino acid residues are highlighted.

1128

1129 **Figure 7-Figure Supplement 1.**

Fig 7. S1

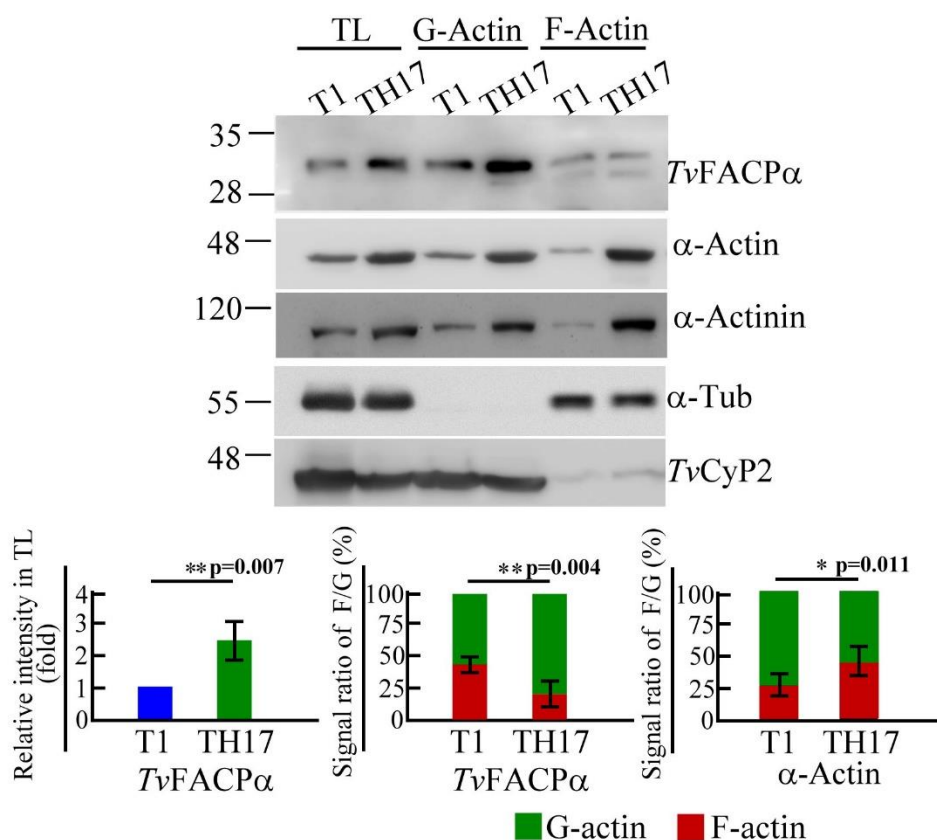

1130

1131

1132

1133

1134

1135

1136

1137

1138

**Figure 7-Figure Supplement 1. Differential expression of *TvFACPα* in nonadherent and adherent isolates of *T. vaginalis*.** The protein lysates from Figure 2E were re-examined by western blotting with the anti-*TvFACPα* antibody. The relative intensity of *TvFACPα* detected in total lysate, the signal ratio of *TvFACPα* in F-actin versus G-actin fractions were shown in the histograms. The assays were repeated three times. Data in histograms are presented as mean  $\pm$  SEM. Significance with p-value is statistically analyzed by Student's t-test as indicated. (n=3,  $P<0.01$ ,  $P<0.05$ , and ns, no significance).

1139 **Figure 9-Figure Supplement 1.**

## Fig 9. S1

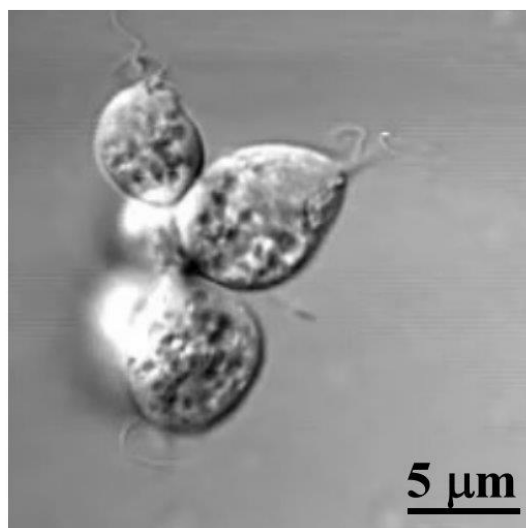

1140

1141 **Figure 9-Figure Supplement 1. Morphology of trophozoites in the bottom well of trans-**  
1142 **well assay.** Morphology of trophozoites migrating into the bottom well was recorded by  
1143 microscopy. The parasite in the bottom well were observed in dominant flagellate trophozoite  
1144 with clear flagella under our assay conditions. The scale bar represents 5 μm.

1145

1146

1147

1 Supplement data and legends

Fig 2. S1

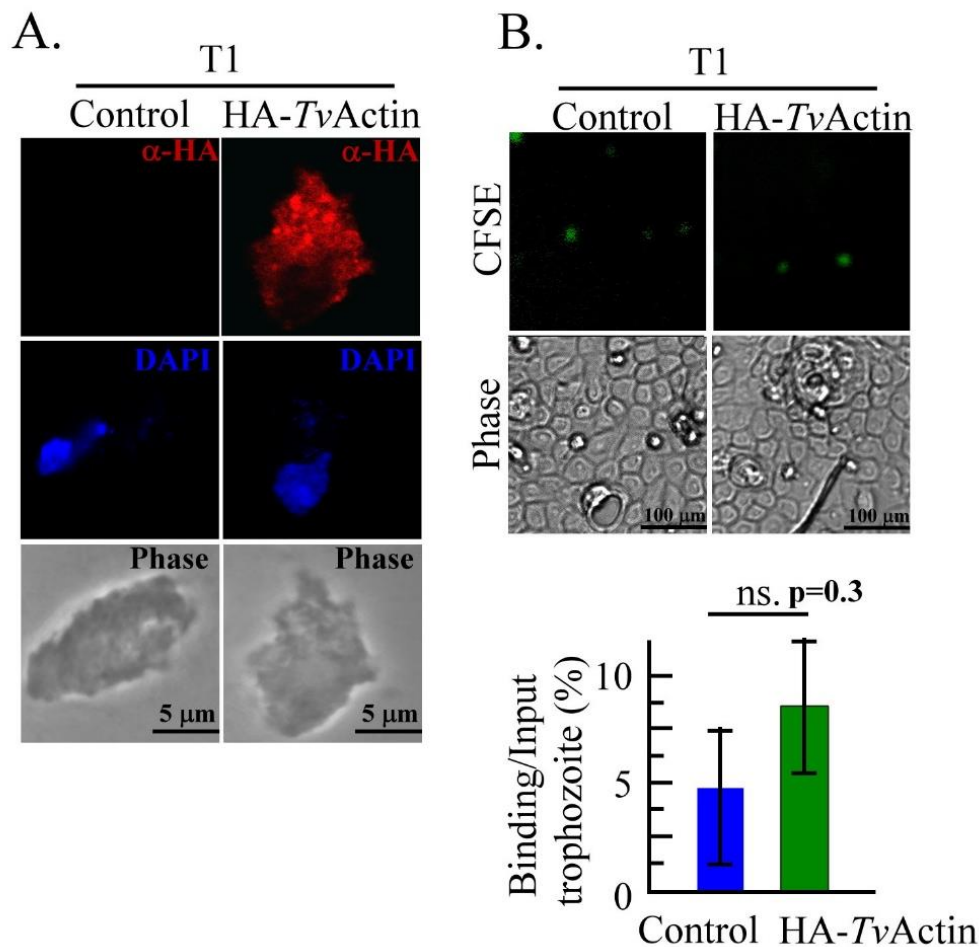

2

3 **Figure 2-Figure Supplement 1. Overexpression of HA-Tvactin in nonadherent T1**

4 **isolate.** (A.) The non-transgenic and HA-Tvactin transgenic T1 trophozoites were fixed

5 for IFA by an anti-HA antibody and then incubated with a Cy3-conjugated secondary

6 antibody. The nuclei were stained by DAPI and the morphology was observed by phase-

7 contrast microscopy. The scale bars represent 5 μm. (B.) The non-transgenic and HA-

8 Tvactin transgenic T1 trophozoites prelabeled by CFSE were co-cultured with hVECs

9 at MOI of 2:1 for 1 hr in the cytoadherence binding assay. The scale bars represent 100

10 μm. The assays were repeated three times. Data in the histogram are presented as

11 mean ± SEM. Significance with p-value is statistically analyzed by Student's t-test as

12 indicated. (n=3, P<0.01, P<0.05, and ns, no significance).

13



## Fig 2. S2

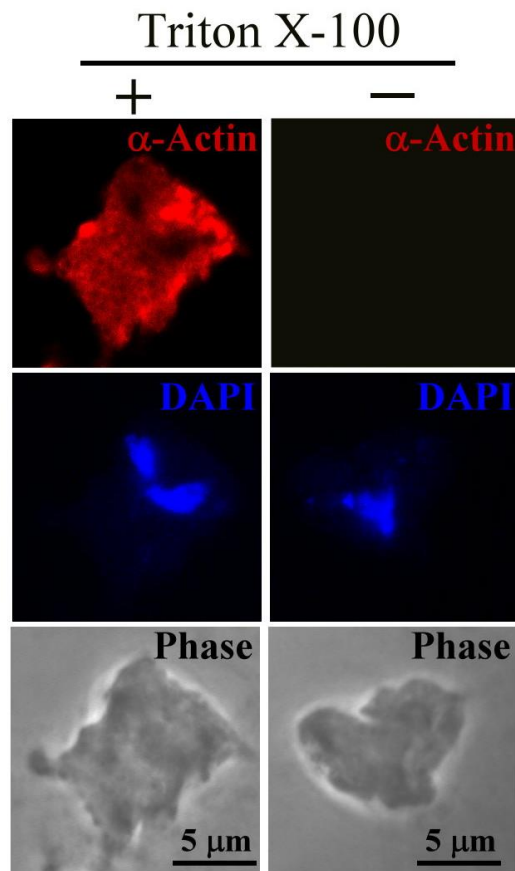

14

15 **Figure 2-Figure Supplement 2. No detectable  $\alpha$ -actin on the cell surface of *T.***  
16 ***vaginalis*.** The TH17 trophozoites with or without Triton X-100 permeation were  
17 examined by IFA using an anti- $\alpha$ -actin antibody, followed by incubation with a Cy3-  
18 conjugated secondary antibody. The nuclei were stained by DAPI. The morphology was  
19 observed by phase-contrast microscopy. The scale bars represent 5  $\mu$ m.

Fig 2. S3

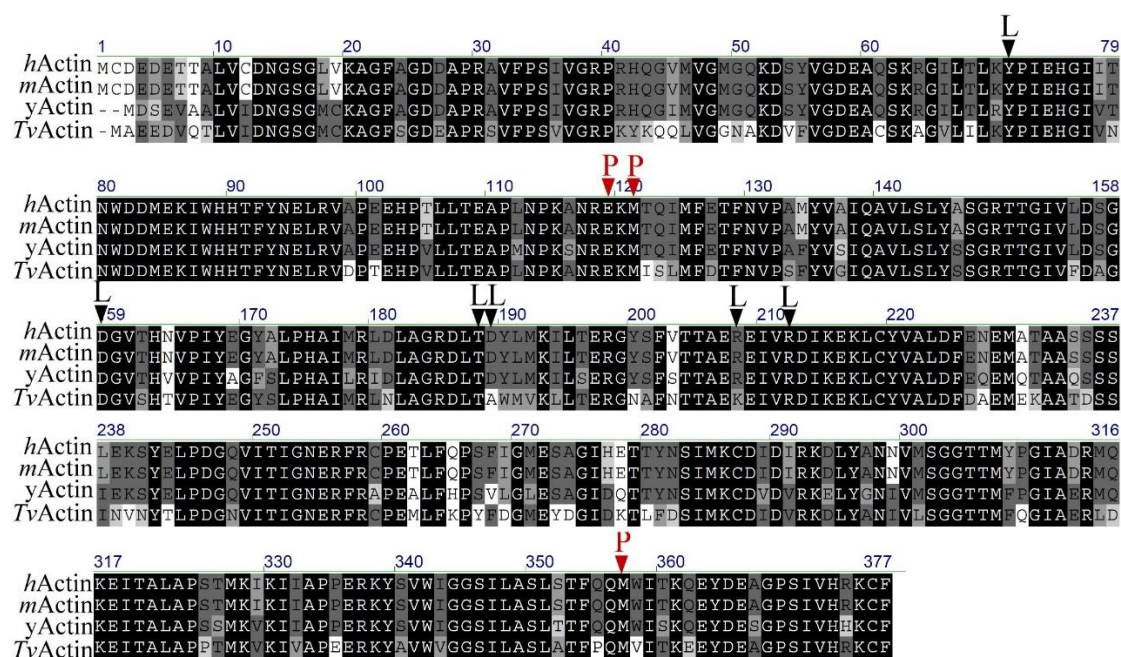

20

21 **Figure 2-Figure Supplement 3. Protein sequence alignment of  $\alpha$ -actin and**  
 22 ***TvFACP $\alpha$* .** (A.) The full-length protein sequences of  $\alpha$ -actin from human (*hActin*,  
 23 P68133), mouse (*mActin*, P68134), yeast (*yActin*, P60010), and *T. vaginalis* (*Tvactin*,  
 24 TVAG\_337240) were aligned to show the protein sequence similarity. The conserved  
 25 amino acid residues are highlighted, and the binding sites of phalloidin or LatB in  $\alpha$ -  
 26 actin are indicated by P or L as shown at the top of sequences, respectively.

Fig 4. S1

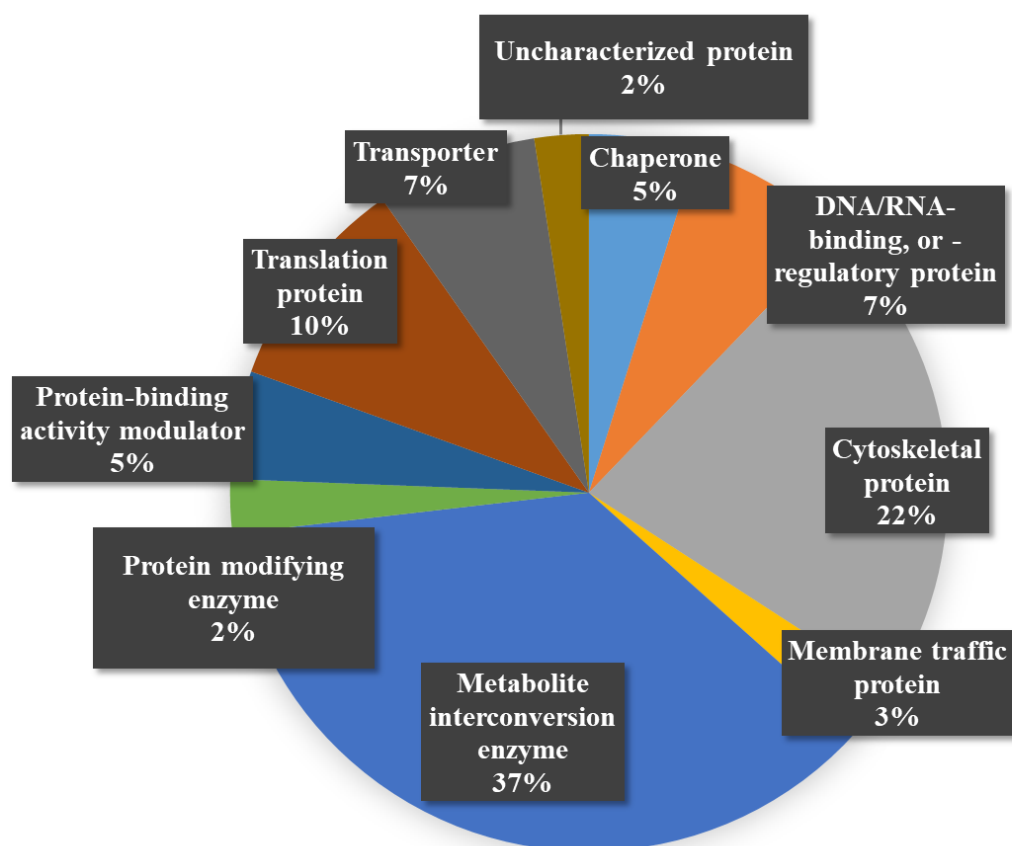

27

28 **Figure 4-Figure Supplement 1. Protein function category.** The mass identified  
29 proteins were classified by function into multiple cellular pathways, including  
30 cytoskeleton proteins (22%), chaperones (5%), membrane trafficking (3%),  
31 transporter (7%), protein binding (5%), modification (2%), DNA/RNA regulation (7%)  
32 and translation (10%), metabolism enzymes (37%), and uncharacterized proteins (2%).

Fig 4. S2

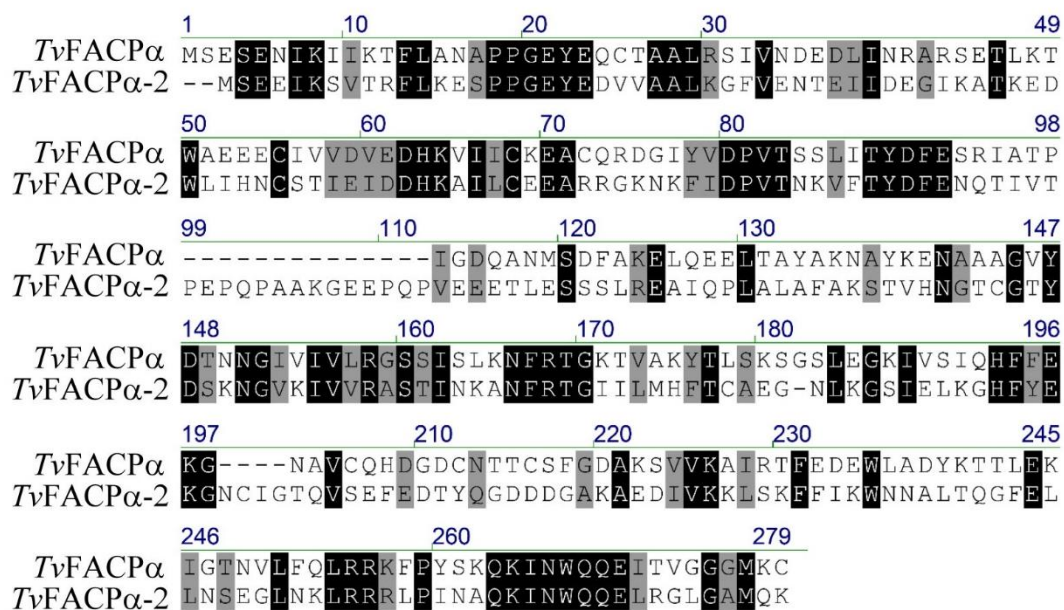

33

34 **Figure 4-Figure Supplement 2. The sequence alignment for *TvFACPs* in *T.***  
35 ***vaginalis*. The protein sequences of *TvFACPα* (TVAG\_470230) and *TvFACPα-2***  
36 **(TVAG\_212270) were aligned. The conserved amino acid residues are highlighted.**

Fig 7. S1

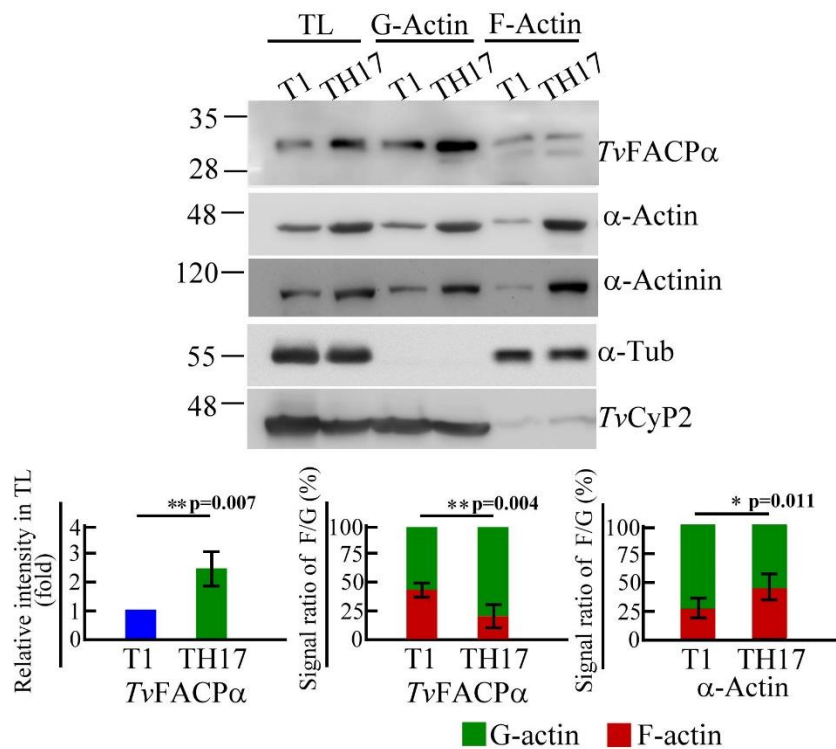

37

38 **Figure 7-Figure Supplement 1. Differential expression of *TvFACPα* in**  
39 **nonadherent and adherent isolates of *T. vaginalis*.** The protein lysates from Fig. 2E  
40 were re-examined by western blotting with the anti-*TvFACPα* antibody. The relative  
41 intensity of *TvFACPα* detected in total lysate, the signal ratio of *TvFACPα* in F-actin  
42 versus G-actin fractions were shown in the histograms. The assays were repeated three  
43 times. Data in histograms are presented as mean ± SEM. Significance with p-value is  
44 statistically analyzed by Student's t-test as indicated. (n=3, P<0.01, P<0.05, and ns, no  
45 significance).

## Fig 9. S1

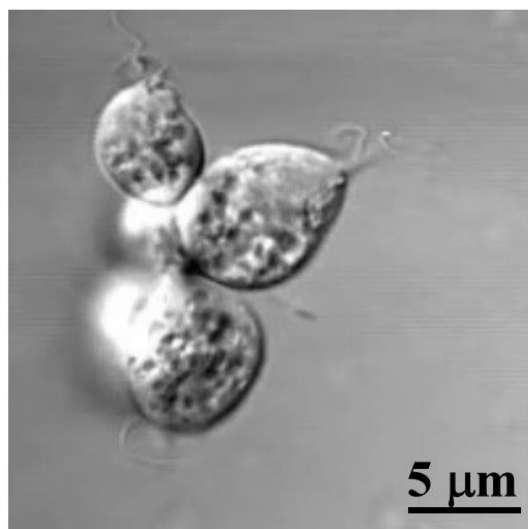

46

47 **Figure 9-Figure Supplement 1. Morphology of trophozoites in the bottom well of**  
48 **trans-well assay.** Morphology of trophozoites migrating into the bottom well was  
49 recorded by microscopy. The trophozoites in the bottom well were observed in  
50 dominant flagellate form with clear flagella under our assay conditions. The scale bar  
51 represents 5 μm.
